1

2 **Experience-dependent modulation of behavioral features in sensory navigation of**  
3 **nematodes and bats revealed by machine learning**

4 Short Title: Machine learning extraction of behavioral features

5

6 Authors: Shuhei J. Yamazaki<sup>1</sup>, Yosuke Ikejiri<sup>1</sup>, Fumie Hiramatsu<sup>1</sup>, Kosuke Fujita<sup>1,5</sup>,  
7 Yuki Tanimoto<sup>1,6</sup>, Akiko Yamazoe-Umemoto<sup>1</sup>, Yasufumi Yamada<sup>2</sup>, Koichi Hashimoto<sup>3</sup>,  
8 Shizuko Hiryu<sup>2</sup>, Takuya Maekawa<sup>4</sup>, Koutarou D. Kimura<sup>1\*</sup>

9

10 **Affiliations**

11 <sup>1</sup>Department of Biological Sciences, Graduate School of Science, Osaka University,  
12 Toyonaka, Osaka 560-0043, Japan

13 <sup>2</sup>Faculty of Life and Medical Sciences, Doshisha University, Kyotanabe, Kyoto  
14 6100321, Japan

15 <sup>3</sup>Graduate School of Information Sciences, Tohoku University, Sendai, Miyagi  
16 980-8579, Japan

17 <sup>4</sup>Department of Multimedia Engineering, Graduate School of Information Science and  
18 Technology, Osaka University, Suita, Osaka 565-0871, Japan

19 <sup>5</sup>Present address: Department of Ophthalmology, Graduate School of Medicine, Tohoku  
20 University, Sendai, Miyagi 980-8574, Japan

21 <sup>6</sup>Present address: RIKEN Brain Science Institute, Wako, Saitama 351-0198, Japan

22

23 \*Correspondence: kokimura-lab@umin.ac.jp or kokimura@bio.sci.osaka-u.ac.jp

24 Classification: Biological Sciences, Neuroscience

25

26 **ABSTRACT**

27 Animal behavior is the integrated output of multiple brain functions. However,  
28 understanding how multiple brain functions affect behavior has been difficult. In order  
29 to decipher dynamic brain functions from time-series of behavioral data, we developed  
30 a machine learning strategy that extracts distinguishing behavioral features of sensory  
31 navigation. We first investigated experience-dependent enhancement of odor avoidance  
32 behavior of the nematode *Caenorhabditis elegans*. We segmented worms' trajectories  
33 during olfactory navigation into two behavioral states, analyzed 92 features of the states,  
34 and automatically extracted 9 distinguishing features modulated by prior odor  
35 experience using a statistical index, the gain ratio. The extracted features included ones  
36 previously unidentified, one of which indicated that the prior odor experience lowers  
37 worms' behavioral responses to a small increase in odor concentration, causing  
38 enhanced odor avoidance. In fact, calcium imaging analysis revealed that the response  
39 of ASH nociceptive neurons to a small odor increase was significantly reduced after  
40 prior odor experience. In addition, based on extracted features, multiple mutant strains  
41 were categorized into several groups that are related to physiological functions of the  
42 mutated genes, suggesting a possible estimation of unknown gene function by  
43 behavioral features. Furthermore, we also extracted behavioral features modulated by  
44 experience in acoustic navigation of bats. Thus, our results demonstrate that, regardless  
45 of animal species, sensory modality, and spatio-temporal scale, behavioral features  
46 during navigation can be extracted by machine learning analysis, which may lead to the  
47 understanding of information processing in the brain.

48

49 **SIGNIFICANCE STATEMENT**

50 Behavior is the most important output of brain activity, and its recording has become  
51 easy because of the development of small and inexpensive cameras and small GPS  
52 devices. However, these "behavioral big data" have been used to calculate very simple  
53 indices, such as speed, direction, and goal arrival rate. In this study, we analyzed animal  
54 behavior using machine learning (also known as "artificial intelligence") and found  
55 specific behavioral features related to navigation in worms and bats. We also found  
56 activity changes in nerve cells that were reflected in the worm's behavioral changes.  
57 Thus, our results demonstrate that artificial intelligence can be used to find  
58 characteristics of animal behavior that would eventually help us understand how the  
59 brain works.

60

61 Keywords: Navigation, Machine Learning, Behavior

## 62 INTRODUCTION

63 Brain activity can be measured as time series vector data of a large number of neural  
64 activities using simultaneous optical monitoring recently (1, 2). Behavior, the integrated  
65 output of multiple brain functions such as sensory perception, memory, emotion, and  
66 decision-making, however, is still analyzed in classic ways and insufficiently studied  
67 using simple and subjectively chosen measures, such as velocity, migratory distance,  
68 and/or the probability of reaching to a particular goal. This large asymmetry in data  
69 between neural activity and behavior has emerged as one of the significant issues in  
70 modern neuroscience (3-5). In other words, without describing when and how behavior  
71 changes in detail, we may not be able to fully interpret the meaning of large-scale  
72 records of neural activities. One cause for this problem is the difficulty in the analysis of  
73 behavior: Although machine-vision techniques over small areas and GPS-based  
74 tracking over large areas allow us to continuously monitor the positions and/or postures  
75 of animals, it is still unclear which aspects of behavioral features should be focused to  
76 clarify the relationships with neural activities.

77

78 One way to solve this problem is to use machine learning. Machine learning is a method  
79 of extracting latent patterns and discovering knowledge from a large amount of data (6).  
80 Machine learning-based behavioral analyses of model invertebrates, such as the fruit fly  
81 *Drosophila melanogaster* and the nematode *Caenorhabditis elegans*, have been  
82 performed because these model animals are suitable for machine vision monitoring of  
83 their behavior due to their small size and relatively simple behavioral patterns (7-13).  
84 Furthermore, these animals have relatively small neural circuits, and multiple genetic

85 techniques are available, suggesting that comprehensive analysis of brain function at  
86 behavioral, neuronal, and molecular levels is feasible. These analyses have provided  
87 new insights into behavioral states and behavioral motifs during voluntary movement,  
88 as well as the relationships between optogenetic activation of neurons and behavioral  
89 responses. However, machine learning has not been used to understand the brain  
90 activity related to sensory behaviors: How is environmental information transformed  
91 into behavioral responses through sensory perception and decision-making, as well as  
92 its modulation by memory and/or emotion in the nervous system? The lack of research  
93 in this topic is likely due to the fact that these invertebrate model animals are too small  
94 to accurately and easily measure sensory input during behavior. In addition, even when  
95 sensory input can be measured, the method to effectively reveal the dynamic  
96 relationships between sensory input and behavioral output has not been established.

97

98 In the present study, we aimed to establish a method to objectively and  
99 comprehensively extract behavioral features that are possibly linked to the neural  
100 activities for sensory behavior. For that purpose, we analyzed two types of sensory  
101 navigation that have been monitored quantitatively but are different in modality and  
102 spatio-temporal scale—olfactory navigation of *C. elegans* and acoustic navigation of  
103 the bat *Rhinolophus ferrumequinum nippon*—using machine learning. In particular, we  
104 focused on experience-dependent modulation (i.e., "learning"; to avoid confusion with  
105 machine learning analysis, we do not use this term for biological learning hereafter) of  
106 navigation as a model for efficient extraction of differences in behavioral features. In *C.*  
107 *elegans*, experience-dependent behavioral modulation has been studied in thermotaxis

108 and salt-taxis, in which worms move in a preferred direction by changing the frequency  
109 of directional changes depending on the intensity of the sensory stimulus (14).  
110 Consistently, changes in neural activity to a stepwise stimulus change have been  
111 revealed by calcium imaging mostly of immobilized worms and in a few cases of freely  
112 moving worms (15-20). However, it has not been fully clarified how those behaviors  
113 are regulated by neural activity that responds to slight changes in stimuli during  
114 navigation in a sensory gradient as well as how the behavioral and neural responses are  
115 modulated by experience. Furthermore, although large scale analyses of mutant strains  
116 are available (12, 21), methods for effectively analyzing the differences in  
117 experience-dependent modulation of sensory behaviors of mutant strains have not been  
118 established.

119  
120 To reveal experience-dependent modulations of olfactory navigation in worms, we  
121 extracted prominent features of behavior and their relationships to odor stimuli using  
122 machine learning. For this, we segmented the animals' navigation into two behavioral  
123 states and, for individual states, calculated the gain ratio, a statistical index used in  
124 decision tree analysis to identify features that distinguish the data in different classes  
125 (22). We chose this method because it allows us to easily interpret the results of the  
126 analysis for the planning of physiological experiment of neural activities. In the present  
127 study, we analyzed 92 features of behavior and sensory information from each of ~200  
128 behavioral states of wild-type worms either with or without a prior odor experience (25  
129 worms per condition) and found that 9 features are modulated in an  
130 experience-dependent manner. One of the extracted features, the reduction in behavioral

131 response to a small increase in odor concentration, was consistent with a change in  
132 neuronal activity revealed by calcium imaging. In addition, we calculated gain ratios to  
133 identify the experience-dependent changes in olfactory navigation of multiple mutant  
134 strains and found that the mutants were categorized into several groups based on  
135 behavioral features, which reflect physiological functions of the mutated genes.  
136 Furthermore, we also identified experience-dependent modulation of behavioral  
137 features from bat acoustic navigation. Thus, we propose that machine learning analysis  
138 with gain ratios is an efficient strategy to reveal features of animal behavior in general.

139

## 140 **METHODS**

### 141 **Cultivation of worms**

142 The techniques used for culturing and handling *C. elegans* strains have been essentially  
143 described previously (23). Wild type Bristol strain RRID:WB-STRAIN:N2\_Male and  
144 mutant strains RRID:WB-STRAIN:MT1219 *egl-3(n589)*, RRID:WB-STRAIN:VC671  
145 *egl-3(ok979)*, RRID:WB-STRAIN:CX4544 *ocr-2(ak47)*, RRID:WB-STRAIN:JC1636  
146 *osm-9(ky10)*, RRID:WB-STRAIN:JC0570 *tax-4(p678)* were obtained from the  
147 Caenorhabditis Genetics Center (University of Minnesota, USA).

148 RRID:WB-STRAIN:KDK1 *dop-3(tm1356)* was originally obtained from National  
149 BioResource Project (Japan) and backcrossed five times with N2 .

150

### 151 **Analysis of worms' olfactory navigation**

152 A 2-nonanone avoidance assay was performed as described previously (24, 25). Briefly,  
153 2-3 young adult hermaphrodite worms grown synchronously were placed in the center

154 of a 9-cm nematode growth media (NGM) plate, and 2  $\mu$ L of 30% 2-nonanone (cat. no.  
155 132-04173; Wako, Japan) diluted in EtOH (cat. no. 0057-00456; Wako, Japan) were  
156 dropped in two spots on the surface of the NGM plate (Fig. 1A top), and the worms'  
157 behavior was recorded for 12 min. This assay was performed under the following three  
158 conditions: the worms cultivated on NGM plates with their food bacteria  
159 RRID:WB-STRAIN:OP-50 were briefly washed with NGM buffer and subjected to the  
160 assay ("naive" condition), or they were subjected to the assay after 1 h of preexposure to  
161 0.6  $\mu$ L of 15% 2-nonanone diluted in EtOH or to only EtOH spotted on the lid of a  
162 NGM plate without food ("preexp" and "mock" conditions, respectively). We added the  
163 mock-treated control to confirm that 1-h starvation did not affect the odor avoidance  
164 behavior of worms and to extract behavioral features modulated by the odor  
165 preexposure compared to the naive and the mock-treated controls. Images of worms the  
166 NGM plate during odor avoidance assay were acquired by a high-resolution USB  
167 camera (DMK 72AUC02; The Imaging Source, USA) with a lens (LM16JC5MW;  
168 Kowa, Japan) at 1 Hz for 12 min. From the recorded images, the coordinates of  
169 individual animals' centroids were acquired using Move-tr/2D software (Library Co.,  
170 Ltd., Tokyo, Japan) and used for the following analysis.

171

172 Similar to worms' other sensory behaviors, trajectories in the 2-nonanone avoidance  
173 assay can be divided into two states: "run", a relatively long period of straight  
174 movement, and "pirouette", a period of short movements interrupted by frequent  
175 reversals and turns (24, 26). Angular change per s was calculated from the centroid  
176 coordinates, and movements of 1 s with angular change larger than 90° were classified



177 as a turn. A histogram of turn intervals was fitted by two exponentials, suggesting that  
178 turn intervals are regulated by two probabilistic mechanisms (25, 26). The time of the  
179 intersection of the two exponentials was defined as  $t_{crit}$ , and turn intervals longer or  
180 shorter than the  $t_{crit}$  were classified as runs or included in pirouettes, respectively.  $t_{crit}$   
181 was calculated for the control (i.e., naive plus mock-treated) condition for wild-type and  
182 mutant strains, respectively. In this study, we analyzed features of runs but not of  
183 pirouettes except for their duration because pirouettes appear to have little effect on  
184 odor avoidance (25). Excel 2010 (Microsoft Corp.) was used for these calculations. The  
185 odor concentrations that worms experienced at specific spatio-temporal points were  
186 calculated according to the dynamic odor gradient model based on the measured odor  
187 concentration (19).

188

## 189 **Bats**

190 As previously described, three adult Japanese horseshoe bats (*Rhinolophus*  
191 *ferrumequinum nippon*, body length: 6.0–8.0 cm, body mass: 20–30 g) were captured  
192 from natural caves in Hyogo and Osaka prefectures in Japan (27). The bats were housed  
193 in a temperature- and humidity-controlled colony room [4 (L) × 3 (W) × 2 m (H)] with  
194 a 12-h-on/12-h-off light cycle at Doshisha University in Kyoto, Japan. The bats were  
195 allowed to fly freely and given access to mealworms and water. Captures were  
196 conducted under license and in compliance with current Japanese law. All experiments  
197 complied with the Principles of Animal Care, publication no. 86-23, revised 1985, of  
198 the National Institutes of Health, and with current Japanese law. All experiments were  
199 approved by the Animal Experiment Committee of Doshisha University.

200

201 **Bat acoustic navigation**

202 Methods for acoustic navigation measurement in bats have been described elsewhere  
203 (Yamada et al., in revision). In brief, the experiments were conducted in a flight  
204 chamber, which was constructed of steel plates [9 (L) × 4.5 (W) × 2.5 m (H)] under  
205 lighting with red filters (>650 nm) to avoid visual effects on the bats. An obstacle  
206 environment was constructed using plastic chains (4 cm in diameter) that were  
207 suspended from the ceiling of the chamber. The chains were arranged at 15-cm intervals  
208 in the *x*-axis and at 22-cm intervals in the *y*-axis so that the bat was forced to fly in an  
209 S-shaped pattern without passing between chains. With this layout, three naive bats  
210 were used: each bat was observed for 12 continuous repeated flights so that  
211 echolocation behaviors in unfamiliar and familiar spaces could be compared. In this  
212 study, the initial three flights were defined as unfamiliar flights, and the last three flights  
213 were defined as familiar flights.

214

215 The flight behavior of the bats was recorded using two digital high-speed video cameras  
216 (MotionPro X3; IDT Japan, Inc., Japan) at 125 frames/s, which were located in the left  
217 and right corners of the flight chamber. Based on a direct linear transformation  
218 technique, the successive 3D positions of the flying bats, as well as the locations of  
219 other objects, were reconstructed using motion analysis software (DIPPMotionPro  
220 ver. 2.2.1.0; Ditect Corp., Japan). The flight velocity vector of the bat was calculated as  
221 the time derivative of the coordinates of its flight trajectory.

222

## 223 Behavioral parameters included in a feature vector

224 For the machine learning analysis of worm olfactory navigation, the following  
225 behavioral features were calculated for each run from the centroid coordinates of the  
226 worms: start time (*RunTime*), serial number (*RunNum*), velocity (*V*), bearing (*B*), odor  
227 concentration that a worm experienced during run (*C*), directionality ratio (*Dir*) (28),  
228 run's curvature (called weathervane; *WV*) (29), run duration (*RunDur*), and duration of  
229 pirouette just before the run (*PirDur*). Time-differential values were calculated for *V*  
230 (*dV*), *B* (*dB*), and *C* (*dC*). For these values, the average (*Ave*) during a run as well as  
231 average values over 2 s at the initiation (*Ini*) and at the termination (*Ter*) of a run were  
232 also calculated. For *Ini* and *Ter*, 0-2 s after the initiation and 2-4 s before the  
233 termination of a run were used; we did not use 0-2 seconds before the termination  
234 because previous studies revealed that a worm's speed drops largely during this period  
235 (25, 26). Although the time windows for worms were set based on the previous studies,  
236 the optimal time windows for bats were calculated by machine learning (see below). In  
237 addition, to analyze whether these features are independent for each run (in other words,  
238 whether any long-term trend among runs across a pirouette exists), we also calculated  
239 hysteretic effects ( $\Delta$ ) of these run features between successive runs for *V*, *dV*, *B*, *dB*, *C*,  
240 and *dC*—in fact, a certain relationship between bearings before and after a pirouette  
241 (*B\_Ini* $\Delta$ *Ter*) has been reported in salt-taxis (26). For this, *Ave*, *Ini*, or *Ter* of each run  
242 feature was subtracted from any of the previous run features. Hysteretic effects were  
243 calculated for just one feature for *RunDur*, *PirDur*, and *WV*, which only possess one  
244 value per run, and not calculated for *RunTime* and *RunNum*. A total of 92 features were  
245 calculated by combining all these features.

246

247 For analysis of changes in the flight of the bats, the following behavioral features in  
248 each flight were calculated from the coordinates of the animals and obstacles:  
249 three-dimensional flight velocity ( $V$ ), horizontal and vertical bearings of the flight  
250 ( $B_{\text{hori}}$  and  $B_{\text{vert}}$ , respectively), distance ( $R_{\text{obs}}$ ) and bearing ( $B_{\text{obs}}$ ) of the bat to  
251 the nearest edge point of the obstacle chain array, longitudinal directional distance to  
252 the frontal chain array ( $R_x$ ), lateral directional distance to the inside pitch of the chain  
253 array ( $R_y$ ). Time-differential values were calculated for  $V$  ( $dV$ ),  $B$  ( $dB$ ),  $dB$  ( $ddB$ ), and  
254 the flight height ( $dH$ ), which were calculated with frame units of the high-speed video  
255 cameras (1/125 s). All flight trajectories were divided into three segments: earlier,  
256 middle, and later terms. The time window for the analysis of each behavioral feature  
257 was 0.1, 0.2, or 0.3 s before or when ( $t = 0$ ) passing through the chain array. A total of  
258 42 features were calculated by combining all these features.

259

260 Excel 2010 and Visual C# (Microsoft) were used for the calculations, and the  
261 Beeswarm package for R software (The R Project) was used for the scattered plot of  
262 data. These parameters are listed in Table 1 for worms and in Table 4 for bats.

263

#### 264 **Behavioral classification with gain ratio**

265 In order to extract useful features, we calculated the gain ratio used in C4.5 decision tree  
266 analysis (30) for each feature. In decision tree analysis, the amount of information,  
267 which is acquired when a group of data is divided into sub-groups by a certain feature,  
268 is calculated as information gain. In other words, when dividing a group into sub-groups

269 by applying a certain feature, information gain is an index indicating the amount of the  
270 increased bias of data in the sub-groups after the division. The information gain was  
271 then divided by split info, a degree of division, for normalization to compute the gain  
272 ratio. For worm olfactory navigation, we extracted behavioral features that have  
273 positive gain ratios in naive versus preexposed worms or in mock-treated versus  
274 preexposed worms. Then, we chose the features that were common in both comparisons  
275 as "features modulated in experience-dependent manner". For bat acoustic navigation,  
276 behavioral features were extracted from the comparison of unfamiliar flights (1<sup>st</sup>-3<sup>rd</sup>)  
277 and familiar (10<sup>th</sup>-12<sup>th</sup>) flights. Weka software (the University of Waikato, New  
278 Zealand) (31) was used for the calculation.

279

## 280 **Calcium imaging**

281 Calcium imaging of the worms' ASH neurons was performed according to a previous  
282 report (19). Briefly, transgenic strains expressing GCaMP3 (32) and mCherry (33) in  
283 ASH sensory neurons under the *sra-6* promoter (KDK70034 and KDK70072; 20 ng/μl  
284 of *sra-6p::GCaMP3*, 20 ng/μl of *sra-6p::mCherry*, 10 ng/μl of *lin-44p::GFP*, 50 ng/μl  
285 of PvuII-cut N2 genomic DNA as a carrier in N2 background) were placed on an NGM  
286 agar plate on a robotic microscope system, OSB2 (19). Although these transgenic  
287 worms were immobilized with the acetyl choline receptor agonist levamisole (34) for  
288 high-throughput data acquisition by simultaneous imaging of multiple worms, the  
289 previous study revealed that the ASH activity is essentially unaffected by  
290 levamisole-treatment (19). For these worms, a constant gas flow of 8 mL/min was  
291 delivered, in which the mixture rate of 2-nonanone gas versus the air was changed to

292 make a temporal gradient of the odor concentration. The temporal change in odor  
293 concentration was measured by a custom-made semiconductor sensor before and after  
294 the series of calcium imagings on each day. The fluorescence signals of GCaMP3 and  
295 mCherry in ASH neurons were divided into two channels using W-View (Hamamatsu,  
296 Japan), an image splitting optic, and captured by an EM-CCD camera (ImagEM;  
297 Hamamatsu, Japan) at 1 Hz. The intensities of fluorescence signals from cell bodies  
298 were extracted and quantified by ImageJ (NIH) after background subtraction. The  
299 average ratio over 30 s prior to the odor increase was used as a baseline ( $F_0$ ), and the  
300 difference from  $F_0$  ( $\Delta F$ ) was used to calculate the fluorescence intensities of GCaMP3  
301 and mCherry ( $F = \Delta F/F_0$ ). The ratio between fluorescence intensities of GCaMP and  
302 mCherry (GCaMP/mCherry) was used in the figure.

303

#### 304 **Statistical analysis**

305 For comparisons of behavioral features among naive, mock-treated, and preexposed  
306 worms, the Kruskal-Wallis multiple comparison test followed by the *post hoc* Dunn's  
307 test were used (Fig. 2, 3 and 4), except for in the analysis of directional data, for which  
308 the Mardia-Watson-Wheeler test was used. The calculations were performed with Prism  
309 ver. 5.0 for Mac OSX (GraphPad Software, CA, USA), R (The R Project) or SPSS  
310 version 23 (IBM Corp.).

311

## 312 **RESULTS**

313 **A strategy for extracting features of sensory navigation that were modulated by**  
314 **prior experience**

315 In this study, we aimed to extract behavioral features using machine learning to  
316 understand changes in information processing in the brain during sensory navigation.  
317 However, identifying characteristic changes in behavior and sensory stimulus during  
318 navigation has been difficult. It is because sensory stimulus in general changes  
319 gradually and continuously during navigation, which may cause gradual or sudden  
320 response at some aspects of behavior with certain probabilities. In order to efficiently  
321 extract behavioral features of sensory navigation by machine learning, we considered  
322 the following points for the analysis: (1) segmenting behavioral states, (2) representing  
323 the animal's position as a single point, (3) calculating sensory information, and (4) using  
324 a statistical index, gain ratio.

325

### 326 *Segmenting behavioral states*

327 Segmentation is one of the important preprocessing steps of a large dataset for effective  
328 analysis (35). We considered an animal's navigation to be a series of transitions among a  
329 limited number of behavioral states for a certain period, and we analyzed features in  
330 each of the behavioral states instead of analyzing features in an entire navigation  
331 trajectory or in very short temporal unit (i.e., second or sub-second). For worm  
332 olfactory navigation, we segmented the navigation into two well-established behavioral  
333 states: runs and pirouettes (14, 26; see METHODS for details). For bat acoustic  
334 navigation, we considered the period from passing one obstacle (or from the starting  
335 point) until passing the next obstacle as one behavioral state.

336

### 337 *Representing animal's position as a point*

338 During a behavioral state in navigation, animals move a certain distance. For the sake of  
339 proper dimensionality reduction, we calculated the trajectories of a point representing  
340 animal's position (centroid for worms and head position for bats), instead of the posture  
341 of an animal, whose description requires more detailed spatial and temporal  
342 information.

343

#### 344 ***Sensory information***

345 Sensory information is a key factor affecting an animal's behavior. However, because  
346 of technical difficulties, it has been included in the analysis of sensory navigation only  
347 in a few cases for small model animals (17, 19, 36). We included the information of  
348 odor concentration, which changes dynamically during navigation of worms, as  
349 revealed by the direct measurement of odor concentrations in specific spatio-temporal  
350 points in a behavioral arena (19).

351

#### 352 ***Gain ratio***

353 To comprehensively examine behavioral features that can be modulated by prior  
354 experience, we focused on a statistical index used in machine learning-based  
355 classification analysis. In general, classification analysis is the task of classifying new,  
356 unlabeled data into appropriate classes using characteristic features and their parameters  
357 that have been extracted from the known class-labeled data. In the present study,  
358 however, the classification itself was not meaningful because the data were already  
359 classified, such as with or without prior experience or wild-type versus mutant strains.  
360 Instead, we focused on the procedure in the classification that finds features useful for



361 distinguishing between the two classes. In other words, behavioral features modulated  
362 by prior experience should be able to effectively classify the behavioral data of animals  
363 with or without this experience.

364

365 For this purpose, we chose to use gain ratio, the index for decision tree analysis (22).

366 Binary decision tree analysis is performed to split a data set into two sub-groups by

367 automatically selecting the best feature and its parameter that has the largest

368 information gain, the difference of the uncertainty ("information entropy") before and

369 after division; each data point is classified into either of the sub-classes based on

370 whether it has a larger or smaller value than the threshold. When applied for binary

371 classification, decision tree analysis automatically evaluates the classification

372 performance of all of a large number of features that are designed by the researchers.

373 The result of this analysis is the extraction of certain features, which allows us to easily

374 understand the usefulness of particular features for the classification. This is a

375 substantial difference from the analysis by support vector machines and/or deep neural

376 networks, where the relationships between features of the data and the classification are

377 not easily discernible (see DISCUSSION).

378

379 **Behavioral features modulated by the prior experience in worm odor avoidance**

380 **behavior**

381 We analyzed the experience-dependent enhancement of odor-avoidance behavior of *C.*

382 *elegans* as a model. We have reported that preexposure of worms to the repulsive odor

383 2-nonanone causes enhancement of avoidance behavior to the odor. After 1 h of

384 preexposure, worms migrate farther away from the odor source as a type of  
385 non-associative middle-term learning (24). A series of genetic analyses indicated that  
386 neuropeptide and dopamine signaling pathways are required for acquisition and  
387 execution of the odor memory, respectively (25), suggesting that this non-associative  
388 middle-term memory is caused by a circuit-level modulation of neural activity rather  
389 than simple sensory sensitization.

390

391 Previous studies analyzed several features and revealed that run duration is the major  
392 behavioral change caused by odor preexposure, likely because of reduction in the  
393 pirouette initiation rate (24, 25). However, this did not rule out the possibility that other  
394 behavioral features play more profound effects. Moreover, multiple mutant strains  
395 exhibit their own abnormalities in the enhanced odor avoidance behavior (see below),  
396 although identification of the features modulated in each mutant strain is  
397 time-consuming and laborious. To reveal features modulated by prior experience  
398 comprehensively and effectively, we calculated the gain ratio by comparing naive  
399 versus preexposed and mock-treated versus preexposed animals, and we considered  
400 features that were extracted from both comparisons.

401

402 In the machine learning analysis, we calculated gain ratios of 92 features (Fig. 1 and  
403 Table 1; see METHODS for details) and extracted 18 and 15 features from the  
404 comparisons of naive versus preexposed and mock-treated versus preexposed worms,  
405 respectively (Table 2). Nine features were shared between the two comparisons,  
406 suggesting that those features were modulated by the prior experience to cause the

407 enhanced odor avoidance (Table 2 and Fig. 2A). These features are related to run  
408 duration (*RunDur*), temporal differences in bearing (*dB\_X*), odor concentration (*C\_X*),  
409 and its temporal difference during runs (*dC\_X*). Modulation of run duration (*RunDur*;  
410 Fig. 2B) by the prior odor experience was previously revealed by traditional analysis  
411 (24). Thus, this result supports the validity of the machine learning analysis.

412

413 Experience-dependent modulations of temporal differences in bearing (*dB\_X*; Fig. 2C  
414 for example and Table 2) have not been revealed previously. Its contribution to the  
415 enhancement of avoidance distance, however, are unclear. Differences between the  
416 average or the terminal bearing change and the previous initial value (*dB\_AveΔIni* or  
417 *dB\_TerΔIni*) were also extracted (Table 2), while the differences were likely due to the  
418 modulation in the previous initial value ( $\Delta Ini$ ), not due to the change in hysteretic  
419 effects.

420

421 Odor stimuli during runs, which likely drive the worms' odor avoidance behavior, were  
422 also found to be modulated in several aspects: the initial, terminal, and average odor  
423 concentration (*C\_Ini*, *C\_Ter*, and *C\_Ave*), and the terminal and average odor  
424 concentration change (*dC\_Ter* and *dC\_Ave*) (Table 2; Fig. 2D and E for *C\_Ave* and  
425 *dC\_Ave*, respectively, for examples). However, this result does not directly imply that  
426 the lower odor concentration is the causal reason for the enhanced avoidance distance;  
427 one possible scenario is that, because the odor-experienced worms were located farther  
428 away from the odor source, they sensed a lower concentration of the odor.

429

430 Because the terminal and average values of odor concentration change ( $dC_{Ter}$  and  
431  $dC_{Ave}$ ) were extracted, and because a previous study demonstrated that worm odor  
432 avoidance behavior depends on  $dC$ , rather than  $C$ , at least in naive conditions (19), we  
433 investigated these features more in detail. We compared ensemble averages of  $dC/dt$   
434 that worms sensed during the last 30 s of each run (Fig. 2F). Interestingly, although  
435 most of the control (*i.e.* naive and mock-treated) worms sensed 2-3  $\mu\text{M}$  odor  
436 concentrations (Fig. 2D),  $dC/dt$  at the end of each run was  $\pm 0.1$  nM/s on average (Fig.  
437 2F;  $0.09 \pm 0.72$  and  $-0.09 \pm 0.76$  nM/s for naive and mock-treated animals, respectively).  
438 This result suggests that, to initiate a pirouette, worms respond to a subtle odor  
439 concentration change, of which the magnitude is 1/20,000 - 1/30,000 of the odor  
440 concentration itself per second. Even considering that sensory information is temporally  
441 integrated for a few seconds during worm chemosensory navigation (19, 37), this value  
442 is far lower than the general psychological threshold for sensory signals: The lower  
443 threshold of signal change ( $\Delta S$ ) is more than 1/100 of the signal intensity ( $S$ ) (38).  
444  
445 This extreme sensitivity to positive  $dC/dt$  was modulated by prior experience of the  
446 odor. The terminal  $dC/dt$  was significantly higher than in naive and mock-treated  
447 animals ( $1.58 \pm 0.6$  nM/s compared to the values in the previous paragraph;  $p < 0.01$ ,  
448 the Kruskal-Wallis multiple comparison test followed by the *post hoc* Dunn's test). This  
449 change in terminal  $dC/dt$  could be the cause for the enhanced odor avoidance behavior  
450 and suggest the following model: the worms without prior experience of the odor are  
451 highly sensitive to a slight increase in odor concentration during a run, which is a sign  
452 of inappropriate movement toward the source of the repulsive odor, and they respond to

453 it by initiating a pirouette. In contrast, the worms with prior odor experience ignore the  
454 slight odor increase and continue the run, which leads to a longer run duration (Fig.  
455 2G).

456

457 **The responsiveness of sensory neurons to odor increases was modulated by odor**  
458 **experience**

459 If the change in sensitivity to positive  $dC/dt$  is the causal reason for the enhanced odor  
460 avoidance behavior, it should be associated with changes in neural activity. Thus, we  
461 analyzed the responsiveness of a likely candidate group of neurons, ASH nociceptive  
462 neurons (39, 40). Previously we established the OSB2 microscope system that allows  
463 for calcium imaging of *C. elegans* neurons *in vivo* under odor stimuli resembling ones  
464 that worms experience during the odor avoidance assay in the plates (19). Using the  
465 OSB2 system, we found that ASH neurons are the major sensory neurons to cause  
466 pirouettes upon increases in 2-nonanone concentration (19). However, whether the ASH  
467 response is modulated by 2-nonanone experience has not been studied.

468

469 We found that ASH responses were modulated by prior odor experience in a manner  
470 consistent with the behavioral modulation. When the worms were stimulated with 5  
471 nM/s odor increase, which is the lowest rate of change to cause the threshold-level  
472 behavioral response in the previous study (19), ASH neurons in naive as well as  
473 mock-treated worms exhibited robust responses (Fig. 3A and B). However, the ASH  
474 responses were significantly reduced in the preexposed animals (Fig. 3B and C). This  
475 result suggests that prior odor experience causes the reduced response to the odor

476 increase, which causes longer run durations and enhanced odor avoidance behavior.

477

#### 478 **Extracted behavioral features of mutant strains correspond to gene functions**

479 We also investigated whether feature extraction from behavior of mutant strains can

480 allow us to understand relationships between chemosensory behavior and gene

481 functions in the nervous system. By calculating gain ratios, we analyzed mutants of

482 genes that are known to be involved in the experience-dependent modulation of

483 2-nonanone avoidance behavior, such as that for proprotein convertase (required for

484 neuropeptide signaling), EGL-3 (41), and the D2-type dopamine receptor DOP-3 (25,

485 42), as well as genes involved in sensation of chemical signals, such as those for TRP

486 channel homologs OCR-2 and OSM-9 (43, 44) and the cGMP-gated cation channel

487 TAX-4 (45), whose relationships to the 2-nonanone avoidance behavior have not been

488 studied.

489

490 *egl-3*, encoding a homolog of proprotein convertase, is required for neuropeptide

491 biosynthesis, expressed in many neurons, and known to be involved in various aspects

492 of worm behavior including learning (25, 41, 46). Deletion and missense mutations of

493 the gene are known to cause severe and mild phenotypes, respectively (25, 47). Our

494 previous study revealed that run duration is not increased after preexposure in *egl-3*

495 mutants, suggesting that neuropeptide signaling is required for the acquisition of odor

496 preexposure memory (25). In the present study, the abnormal features were similar

497 between deletion (*ok979*) and missense (*n589*) mutants, namely, run duration

498 (*Run\_Dur*), odor concentration (*C\_Ave*, *C\_Ini*, *C\_Ter*), and odor concentration change

499 (*dC\_Ave*, *dC\_Ter*), although the deletion mutants exhibited additional abnormal  
500 features (Table 3 and Fig. 4). Increases in odor concentration in preexposed worms  
501 were interesting because they were observed only in *egl-3* mutants but not in any other  
502 mutants.

503

504 Mutations in *dop-3*, which encodes a homolog of the D2-type dopamine receptor, were  
505 previously found to affect migratory direction after preexposure (25). This was  
506 concluded because the mutants did not exhibit enhanced avoidance distance, although  
507 run duration was increase after preexposure, and because run terminal bearing (*B\_Ter*)  
508 was worsened (25). These features were extracted in this analysis (Table 3), further  
509 supporting the reliability of this analysis. In addition, the averaged directionality ratio  
510 (*Dir\_Ave*) was worsened (Table 3 and Fig. 4C). This is also consistent with the idea that  
511 migratory direction is worsened in *dop-3* mutants after preexposure. Moreover, lowered  
512 velocity (*V\_Ave*, *V\_Ter*; Table 3 and Fig. 4B) was also extracted, which may also  
513 contribute to the failure in the enhanced odor avoidance. Such multiple abnormal  
514 phenotypes are consistent with the fact that *dop-3* is expressed in many neurons and  
515 involved in the regulation of multiple aspects of behavior (48).

516

517 *ocr-2* and *osm-9* both encode homologs of TRP-type cation channels, expressed in  
518 multiple sensory neurons including ASH neurons and considered to be involved in  
519 sensory perception as well as its modulation (43). We found that mutants for these two  
520 genes did not exhibit significantly enhanced odor avoidance (Fig. 4A). In addition,  
521 these mutants exhibited increases in velocity (*V\_Ave* and *V\_Ter*) after preexposure,

522 which was specific for these two mutants but not observed in other mutants. Some  
523 features are specific for each mutant strains, which may reflect the differences in their  
524 expression and/or function (43). Mutants of *tax-4*, encoding a homolog of the  
525 cGMP-gated cation channel expressed in different sets of sensory neurons, exhibited a  
526 unique pattern of features (Table 3, Fig. 4).

527

528 Taken together, our results suggest that the pattern of extracted features from mutant  
529 strains may reflect functional groupings of the mutated genes. Thus, profiling and  
530 classification of extracted mutant features of unknown genes may be useful to estimate  
531 their physiological functions.

532

### 533 **Feature extraction of experience-dependent modulation of acoustic navigation of** 534 **bats**

535 To demonstrate the general applicability of our method, we examined features of  
536 acoustic navigation in bats. We have previously reported that bats improve their flight  
537 trajectory in an indoor space with obstacles in an experience-dependent manner  
538 (Yamada et al., in revision). Here, we analyzed 42 features using gain ratios and  
539 extracted several features, such as velocity ( $V$ ), distance to the obstacle chain array  
540 ( $R_{obs}$  and  $R_x$ ), and horizontal bearing of the flight ( $B_{hori}$ ) (Table 4 and Fig. 5A-C).  
541 Interestingly, although velocity ( $V$ ) itself was modulated by flight experience,  
542 acceleration ( $dV$ ) was not (Fig. 5D), suggesting that bats may determine flight speed  
543 before initiating but not during navigation, at least in our experimental conditions.  
544 Because the bats' vocalizations reflect their attention or decisions (49), our results



545 suggest that such higher brain functions during navigation could be extracted by  
546 machine learning analysis.

547

## 548 **DISCUSSION**

549 In the present study, we extracted behavioral features that are modulated by experience  
550 from olfactory navigation of worms and from acoustic navigation of bats using machine  
551 learning analysis. In the case of worm olfactory navigation, we found a neural correlate  
552 for one of the newly identified features: The reduced behavioral response to an increase  
553 in odor concentration was consistent with the reduced response of ASH nociceptive  
554 neurons to a small increase in odor concentration. In addition, we also found that mutant  
555 strains can be grouped based on extracted features, which may correspond to the  
556 physiological roles of genes in chemotaxis and/or experience-dependent modulation.  
557 Furthermore, our machine learning analysis was applied to acoustic navigation of bats  
558 to extract the features modulated by prior experience.

559

### 560 **Extraction of behavioral features by machine learning**

561 Machine learning has been playing a major role in classifying behavioral data of model  
562 animals into several categories (7-13, 50). Instead of such behavioral classification,  
563 however, we intended to use a machine learning technique for extracting characteristic  
564 features of sensory behavior to decipher information processing in the brain. For that  
565 purpose, we first hypothesized that a change in a behavioral feature reflects a change in  
566 activity of a functional unit of the brain. Then, we used machine learning to extract  
567 behavioral features that differ between two classes of behavior, rather than to categorize

568 the behavioral data into two classes; in our study, two classes (e.g., "with or without  
569 prior experience" or "wild-type versus mutant strains") were determined *per se* and did  
570 not need to be categorized.

571

572 In addition, we also included sensory information that worms experienced during the  
573 course of behavior in the machine learning analysis. Although small model animals  
574 such as *C. elegans* or *Drosophila melanogaster* are suitable for machine vision  
575 monitoring and subsequent quantitative analysis of behavior, their small size makes it  
576 difficult to measure sensory signals they receive during behavior. We have solved this  
577 problem by precisely measuring the odor concentration at multiple spatio-temporal  
578 points in a paradigm to assess olfactory behavior of worms (19), which allowed us to  
579 include the information of odor concentration and its temporal changes ( $C$  and  $dC$ ) into  
580 the feature vector for the machine learning analysis. Our machine learning method  
581 could also be used for detailed analysis of sensory navigation in the environment where  
582 the gradients of chemical signal were also quantitatively monitored (36, 51, 52).

583

584 As a result, we were able to find multiple behavioral features modulated by prior  
585 experience, including the temporal odor concentration change ( $dC_{Ter}$ ), which was  
586 consistent with the experience-dependent change in the responsiveness of ASH  
587 nociceptive neurons. Such an effective and objective approach to estimate neural  
588 function from comprehensive behavioral analysis may play important roles in the  
589 understanding of recent large-scale monitoring of neuronal activity (see below).

590

591 For machine learning-based classification, support vector machines and deep learning  
592 have also been used (53, 54). However, in these analyses, it is difficult for researchers  
593 to understand which features are characteristic to each group because these algorithms  
594 attempt to combine multiple features in a single representation. In other words, it is  
595 difficult to use the results of classification for subsequent experiments and/or analysis to  
596 further investigate the neural correlates of the behavioral differences. In contrast, in the  
597 calculation of gain ratio, all features are evaluated independently, allowing us to  
598 immediately translate the results of analysis to a new understanding and/or hypothesis  
599 for subsequent experiments and analyses, as shown in the present study. Thus, we  
600 conclude that the method used in this study—making a list of characteristic features  
601 based on gain ratios and subsequently performing detailed analyses on each of extracted  
602 features—is effective to understand the basic principles of neural functions regulating  
603 behavior.

604

605 However, causal relationships among extracted features should be considered carefully.  
606 For example, because odor concentration ( $C$ ) and temporal odor concentration change  
607 ( $dC$ ) are both features of sensory stimuli, they were likely candidates for the cause of  
608 changes in behavioral response. However, we regard that  $dC$ , rather than  $C$  itself, is the  
609 causal reason because of the following: (1) previous quantitative analysis in the plate  
610 assay paradigm revealed that pirouettes and runs are strongly correlated with positive or  
611 negative  $dC$ , respectively, rather than the value of  $C$ ; (2) in the OSB2 robotic  
612 microscope system, positive or negative  $dC$  caused high or low levels of turning, such  
613 as pirouettes and runs, respectively (19). For example, the lower  $C$  in preexposed

614 worms is likely caused by their relatively lower positions in the odor gradient (i.e.,  
615 farther positions from the odor source) caused by the enhanced avoidance behavior. In  
616 other words, sensory behaviors are closed loops—changes in sensory input cause  
617 changes in behavior, while changes in behavior should also cause changes in sensory  
618 input because the positions and/or directions of sensory organs are changed due to the  
619 behavior. Thus, even when sensory features are extracted by machine learning, causal  
620 relationships with behavioral features should be evaluated by independent experiments:  
621 An open loop system, which allows control of sensory stimuli and monitoring behavior  
622 independently, such as the OSB2 system (19), will provide an effective solution.

623

624 Analysis of multiple mutant strains revealed that the extracted features appeared to be  
625 correlated with the physiological roles of the genes. For example, two alleles of a gene  
626 required for neuropeptide signaling (*egl-3*) exhibited similar feature patterns, which  
627 were different from mutants of a dopamine-signaling gene (*dop-3*). In addition,  
628 mutations in two homologous but distinct TRP-type channel genes required for sensory  
629 signaling (*ocr-2* and *osm-9*) exhibited a similar feature pattern, and the one for cyclic  
630 nucleotide-gated ion channels (*tax-4*) exhibited a different pattern. It is interesting that  
631 mutants of genes with similar functions exhibited similar behavioral features although  
632 these genes should influence animal behavior in a complex manner. These results  
633 suggest that behavioral features of mutants of a novel gene may be categorized to a  
634 group of genes which have similar physiological functions. In other words, feature  
635 extraction using gain ratio of multiple mutant strains can allow estimation of gene  
636 functions in the nervous system.

637

638 In conclusion, we established a machine learning method to effectively reveal different  
639 features of two different sensory behaviors. In particular, it is important to include not  
640 only the behavior itself but also environmental sensory information that animals sense  
641 in the feature vectors. Furthermore, it is also necessary to verify causal relationships of  
642 the extracted features by other methods, such as using an open loop experimental setup.  
643 In addition, this method can be used for estimation of the physiological function of  
644 genes.

645

646 This method could be applied to analysis of more complex behaviors of other animals.  
647 In the case of visual and acoustic stimuli, it is not clear what features of the stimuli (e.g.,  
648 shapes, colors, and brightness for visual stimuli, and frequency and intensity for  
649 acoustic stimuli) have the most prominent effects on behavior in a particular context.  
650 We believe that our method presented herein, which allows extraction of the essential  
651 features of information processing for sensory behaviors in the brain in an objective and  
652 comprehensive manner, will help to solve this problem. Poor description of behavior  
653 with simple indices compared to "big data" on neuronal activity is being recognized as  
654 one of the significant problems in modern neuroscience (3-5). We expect that  
655 comprehensive and objective feature extraction would increase the wealth of description  
656 of behavior, which will provide us clues to understand more of the big data from brain  
657 activity monitoring.

658

659 **FIGURE LEGENDS**

660 Figure 1. A workflow of the machine learning method for the analysis of worm odor  
661 avoidance behavior; "Behavioral data" (Top) Examples of the trajectories of 3 worms  
662 during 12 min of 2-nonanone avoidance assay, overlaid on a schematic drawing of a  
663 9-cm agar plate. (Second from the top) A magnified view of trajectories of a worm, in  
664 which runs are blue and pirouettes are red. (Second from the bottom and bottom)  
665 Graphs showing the odor concentration ( $C$ , second from the bottom) and temporal  
666 changes in  $C$  ( $dC$ , bottom) at the worm's position at 1-s intervals during the odor  
667 avoidance assay. "Feature vector" From the  $(x, y)$  coordinates of each worm's centroid,  
668 velocity, bearing, odor concentration, and their derivatives ( $V$ ,  $B$ ,  $C$ ,  $dV$ ,  $dB$ , and  $dC$ ) as  
669 well as the difference between the present and the previous values ( $\Delta$ ) were calculated.  
670 "Gain ratio" One example ( $C\_Ter$ ) of calculating gain ratio is shown.

671

672 Figure 2. Extracted features that were modulated by prior experience of the odor. (A)  
673 Enhanced odor avoidance behavior of worms caused by odor preexposure. (Left) End  
674 points of 25 worms in each condition plotted on a schematic drawing of the assay plate.  
675 (Right) Avoidance distance (distance between the center line of the plate and end point  
676 of behavior) of each worm. Each bar represents median. Significant differences were  
677 observed in the preexposed worms compared to the naive and mock-treated worms  
678 ( $***p < 0.001$ , Kruskal-Wallis test with *post hoc* Dunn's test). (B, C, D and E)  
679 Distributions of extracted features. Duration (B), the initial value of bearing change (C),  
680 the average odor concentration (D), and the average odor concentration change (E) of  
681 each run ( $**p < 0.01$  and  $***p < 0.001$ , Kruskal-Wallis test with *post hoc* Dunn's test).  
682  $t_{crit}$  for wild type worms was 13.1. Bars represent median and first and third quartiles.

683 (F) Time course changes in ensemble averages of odor concentration ( $dC$ ) that worms  
684 experienced before the termination of runs. On average, naive and mock-treated worms  
685 experienced odor decrements of about -8 nM/s until 15 s before the end of each run,  
686 when the decrements started to become very close to zero at the end of the run. In  
687 contrast, preexposed animals consistently experienced smaller (i.e., shallower) odor  
688 decrements during runs, and the average odor concentration changes at the end of runs  
689 were positive. Bars represent mean  $\pm$  SEM. (G) A model relationship between odor  
690 concentration change and behavioral response during navigation along the odor gradient.  
691 When naive and mock-treated worms sensed a slight increase in the odor concentration,  
692 which is a sign of migrating in the wrong direction, they stopped a run and started a  
693 pirouette to search for a new direction. In contrast, the preexposed worms did not  
694 respond to a slight increase in odor concentration, leading to longer run durations and  
695 shorter pirouette durations in total, which likely contribute to the enhanced avoidance  
696 distance. Numbers of worms are 25 for all the conditions, and all the statistical details  
697 are described in Supplementary Table 1.

698

699 Figure 3. Sensory responses to slight odor concentration increases were reduced by  
700 preexposure to the odor. (A) A schematic drawing of calcium imaging of neural activity  
701 of worms under odor stimuli. Several immobilized worms were simultaneously exposed  
702 to an odor flow whose concentration was changed by controlling syringe pumps. (B)  
703 Responses (GCaMP/mCherry) of ASH neurons in naive ( $n = 25$ ), mock-treated ( $n = 29$ ),  
704 and preexposed ( $n = 26$ ) worms. Thick colored lines with gray shadows indicate mean  $\pm$   
705 SEM, and thin lines indicate individual responses. (C) Distributions of peak values

706 during the odor-increasing phase ( $t = 40-80$  s) shown in panel B. Bars represent median.  
707 (\*\*\*) $p < 0.001$ , Kruskal-Wallis test with *post hoc* Dunn's test).

708

709 Figure 4. Examples of extracted features of mutant strains. Avoidance distance (A), the  
710 average velocity (B), the average migratory direction (C), and the initial odor  
711 concentration (D) per run are shown.  $t_{crit}$  for each strain was 8.1 (*egl-3(n589)*), 7.2  
712 (*egl-3(ok979)*), 18.1 (*dop-3(tm1356)*), 11.2 (*ocr-2(ak47)*), 17.8 (*osm-9(ky10)*), and 6.7  
713 (*tax-4(p678)*). Thick bars represent statistical differences between preexposed worms  
714 versus naive *and* mock-treated worms, suggesting differences caused by the odor  
715 preexposure; thin bars represent statistical differences between preexposed worms  
716 versus naive *or* mock-treated worms, which were not caused by the preexposure. (\*\* $p <$   
717 0.01 and \*\*\*) $p < 0.001$ , Kruskal-Wallis test with *post hoc* Dunn's test)

718

719 Figure 5. Experience-dependent changes in bat acoustic navigation. (A) Measurement  
720 system for 3D flight trajectory of a bat during obstacle avoidance flight in a chamber.  
721 (B) Representative flight trajectories of a bat in horizontal plane during repeated flight  
722 in the obstacle course. The top figure combines the initial three (red) and last three  
723 (blue) flight trajectories. Each behavioral feature was collected in three segments:  
724 earlier, middle, and later terms. Bottom figure shows an expanded view of the earlier  
725 term in the first flight. Definition of the horizontal bearing of the flight ( $B_{hor}$ ),  
726 distance ( $R_{obs}$ ), and bearing ( $B_{obs}$ ) of the bat to the nearest edge point of the  
727 obstacle chain array, longitudinal directional distance to the frontal chain array ( $R_x$ ),  
728 and lateral directional distance to the inside pitch of the chains array ( $R_y$ ) are indicated.



729 Time windows for the analysis of each behavioral feature were 0.1, 0.2, or 0.3 s before  
730 or when ( $t = 0$ ) passing through the chain array. (C) A list of extracted features of bat  
731 acoustic navigation modulated by flight experience. (D) Distributions of  $V(-0.3)$  and  
732  $dV(-0.3)$  are plotted. Bars represent median and first and third quartiles. ( $*p < 0.05$ ,  
733 Kruskal-Wallis test with *post hoc* Dunn's test).

734

735

### 736 **ACKNOWLEDGEMENTS**

737 We thank Drs. André Brown, Katsuyoshi Matsushita, Ken-ichi Hironaka, Takuma  
738 Degawa, and the Kimura laboratory members for suggestions and comments on this  
739 work. Nematode strains were provided by the Caenorhabditis Genetics Center (funded  
740 by the NIH Office of Research Infrastructure Programs P40 OD010440) and by  
741 National Bioresource Project funded by the Ministry of Education, Culture, Sports,  
742 Science and Technology (MEXT), Japan. This work was supported by Interdisciplinary  
743 graduate school program for systematic understanding of health and disease (for S.J.Y.),  
744 by KAKENHI 25249020 and JP16H06536 (for K.H.), JP16H06542 (for S.H.),  
745 JP16H06539 (for T.M.), JP16H06545 (for K.D.K.) from the MEXT, by PRESTO  
746 JPMJPR14D8 (for S.H.) by JST, and by Osaka University Co-Creation Program (for  
747 T.M. and K.D.K.).

748

### 749 **AUTHOR CONTRIBUTIONS**

750 S.J.Y, T.M. and K.D.K. designed the experiments, S.J.Y, Y.I., F.H., K.F., Y.T., Y.Y.,  
751 K.H., S.H. and K.D.K. performed the experiments, S.J.Y. and T.M. analyzed the data,  
752 and S.J.Y. and K.D.K. wrote the manuscript. All authors reviewed the manuscript.

753 **REFERENCES**

- 754 1. Alivisatos AP, et al. (2012) The Brain Activity Map Project and the Challenge of  
755 Functional Connectomics. *Neuron* 74(6):970–974.
- 756 2. Landhuis E (2017) Neuroscience: Big brain, big data. *Nature* 541(7638):559–  
757 561.
- 758 3. Krakauer JW, Ghazanfar AA, Gomez-Marín A, MacIver MA, Poeppel D (2017)  
759 Neuroscience Needs Behavior: Correcting a Reductionist Bias. *Neuron*  
760 93(3):480–490.
- 761 4. Gomez-Marín A, Paton JJ, Kampff AR, Costa RM, Mainen ZF (2014) Big  
762 behavioral data: psychology, ethology and the foundations of neuroscience. *Nat*  
763 *Neurosci* 17(11):1455–1462.
- 764 5. Anderson DJ, Perona P (2014) Toward a Science of Computational Ethology.  
765 *Neuron* 84(1):18–31.
- 766 6. Bishop CM (2006) *Pattern Recognition and Machine Learning* (Springer  
767 Verlag).
- 768 7. Vogelstein JT, et al. (2014) Discovery of Brainwide Neural-Behavioral Maps via  
769 Multiscale Unsupervised Structure Learning. *Science* 344(6182):386–392.
- 770 8. Kabra, M., Robie, A. A., Rivera-Alba, M., Branson, S., & Branson, K. (2013).  
771 JAABA: Interactive machine learning for automatic annotation of animal  
772 behavior. *Nat Meth*, 10(1), 64–67.
- 773 9. Branson K, Robie AA, Bender J, Perona P, Dickinson MH (2009)  
774 High-throughput ethomics in large groups of *Drosophila*. *Nat Meth* 6(6):451–  
775 457.
- 776 10. Dankert H, Wang L, Hoopfer ED, Anderson DJ, Perona P (2009) Automated  
777 monitoring and analysis of social behavior in *Drosophila*. *Nat Meth* 6(4):297–  
778 303.

- 779 11. Baek J-H, Cosman P, Feng Z, Silver J, Schafer WR (2002) Using machine vision  
780 to analyze and classify *Caenorhabditis elegans* behavioral phenotypes  
781 quantitatively. *J Neurosci Methods* 118(1):9–21.
- 782 12. Brown AEX, Yemini EI, Grundy LJ, Jucikas T, Schafer WR (2013) A dictionary  
783 of behavioral motifs reveals clusters of genes affecting *Caenorhabditis elegans*  
784 locomotion. *Proc Natl Acad Sci USA* 110(2):791–796.
- 785 13. Stephens GJ, Johnson-Kerner B, Bialek W, Ryu WS (2008) Dimensionality and  
786 Dynamics in the Behavior of *C. elegans*. *PLoS Comput Biol* 4(4):e1000028.
- 787 14. Lockery SR (2011) The computational worm: spatial orientation and its neuronal  
788 basis in *C. elegans*. *Curr Opin Neurobiol* 21(5):782–790.
- 789 15. Suzuki H, et al. (2008) Functional asymmetry in *Caenorhabditis elegans* taste  
790 neurons and its computational role in chemotaxis. *Nature* 454(7200):114–117.
- 791 16. Chronis N, Zimmer M, Bargmann CI (2007) Microfluidics for in vivo imaging of  
792 neuronal and behavioral activity in *Caenorhabditis elegans*. *Nat Meth* 4(9):727–  
793 731.
- 794 17. Clark DA, Gabel CV, Gabel H, Samuel ADT (2007) Temporal activity patterns  
795 in thermosensory neurons of freely moving *Caenorhabditis elegans* encode  
796 spatial thermal gradients. *J Neurosci* 27(23):6083–6090.
- 797 18. Kimura KD, Miyawaki A, Matsumoto K, Mori I (2004) The *C. elegans*  
798 Thermosensory Neuron AFD Responds to Warming. *Curr Biol* 14(14):1291–  
799 1295.
- 800 19. Tanimoto Y, et al. (2017) Calcium dynamics regulating the timing of  
801 decision-making in *C. elegans*. *eLife* 6:13819.
- 802 20. Larsch J, Ventimiglia D, Bargmann CI, Albrecht DR (2013) High-throughput  
803 imaging of neuronal activity in *Caenorhabditis elegans*. *Proc Natl Acad Sci USA*  
804 110(45):E4266–73.
- 805 21. Yemini E, Jucikas T, Grundy LJ, Brown AEX, Schafer WR (2013) A database of  
806 *Caenorhabditis elegans* behavioral phenotypes. *Nat Meth* 10(9):877–879.

- 807 22. Quinlan JR (1986) Induction of Decision Trees. *Mach Learn* 1(1):81–106.
- 808 23. Brenner S (1974) The genetics of *Caenorhabditis elegans*. *Genetics* 77(1):71–94.
- 809 24. Kimura KD, Fujita K, Katsura I (2010) Enhancement of odor avoidance  
810 regulated by dopamine signaling in *Caenorhabditis elegans*. *J Neurosci*  
811 30(48):16365–16375.
- 812 25. Yamazoe-Umemoto A, Fujita K, Iino Y, Iwasaki Y, Kimura KD (2015)  
813 Modulation of different behavioral components by neuropeptide and dopamine  
814 signalings in non-associative odor learning of *Caenorhabditis elegans*. *Neurosci*  
815 *Res* 99:22–33.
- 816 26. Pierce-Shimomura JT, Morse TM, Lockery SR (1999) The fundamental role of  
817 pirouettes in *Caenorhabditis elegans* chemotaxis. *J Neurosci* 19(21):9557–9569.
- 818 27. Yamada Y, Hiryu S, Watanabe Y (2016) Species-specific control of acoustic  
819 gaze by echolocating bats, *Rhinolophus ferrumequinum nippon* and *Pipistrellus*  
820 *abramus*, during flight. *J Comp Physiol A* 202(11):791–801.
- 821 28. Gorelik R, Gautreau A (2014) Quantitative and unbiased analysis of directional  
822 persistence in cell migration. *Nat Protoc* 9(8):1931–1943.
- 823 29. Iino Y, Yoshida K (2009) Parallel use of two behavioral mechanisms for  
824 chemotaxis in *Caenorhabditis elegans*. *J Neurosci* 29(17):5370–5380.
- 825 30. Quinlan JR (1992) *C4.5* (Morgan Kaufmann, San Mateo).
- 826 31. Frank E, Hall MA, Witten IH (2016) The WEKA Workbench (Online Appendix).  
827 *Data Mining* (Morgan Kaufmann). Forth Edition.
- 828 32. Tian L, et al. (2009) Imaging neural activity in worms, flies and mice with  
829 improved GCaMP calcium indicators. *Nat Meth* 6(12):875–881.
- 830 33. Shaner NC, et al. (2004) Improved monomeric red, orange and yellow  
831 fluorescent proteins derived from *Discosoma sp.* red fluorescent protein. *Nat*  
832 *Biotech* 22(12):1567–1572.

- 833 34. Lewis JA, Wu CH, Berg H, Levine JH (1980) The genetics of levamisole  
834 resistance in the nematode *Caenorhabditis elegans*. *Genetics* 95(4):905–928.
- 835 35. Zheng Y (2015) Trajectory Data Mining. *ACM Trans Intell Syst Technol* 6(3):1–  
836 41.
- 837 36. Louis M, Huber T, Benton R, Sakmar TP, Vosshall LB (2008) Bilateral olfactory  
838 sensory input enhances chemotaxis behavior. *Nat Neurosci* 11(2):187–199.
- 839 37. Kato S, Xu Y, Cho CE, Abbott LF, Bargmann CI (2014) Temporal responses of  
840 *C. elegans* chemosensory neurons are preserved in behavioral dynamics. *Neuron*  
841 81(3):616–628.
- 842 38. Teghtsoonian R (1971) On the exponents in Stevens' law and the constant in  
843 Ekman's law. *Psycho Rev* 78(1):71–80.
- 844 39. Kaplan JM (1996) Sensory signaling in *Caenorhabditis elegans*. *Curr Opin*  
845 *Neurobiol* 6(4):494–499.
- 846 40. Bargmann CI (2006) Chemosensation in *C. elegans*. *WormBook*:1–29.
- 847 41. Kass J, Jacob TC, Kim P, Kaplan JM (2001) The EGL-3 proprotein convertase  
848 regulates mechanosensory responses of *Caenorhabditis elegans*. *J Neurosci*  
849 21(23):9265–9272.
- 850 42. Suo S, Ishiura S, Van Tol HHM (2004) Dopamine receptors in *C. elegans*. *Eur J*  
851 *Pharmacol* 500(1-3):159–166.
- 852 43. Tobin D, et al. (2002) Combinatorial expression of TRPV channel proteins  
853 defines their sensory functions and subcellular localization in *C. elegans* neurons.  
854 *Neuron* 35(2):307–318.
- 855 44. Colbert HA, Smith TL, Bargmann CI (1997) OSM-9, a novel protein with  
856 structural similarity to channels, is required for olfaction, mechanosensation, and  
857 olfactory adaptation in *Caenorhabditis elegans*. *J Neurosci* 17(21):8259–8269.

- 858 45. Komatsu H, Mori I, Rhee JS, Akaike N, Ohshima Y (1996) Mutations in a cyclic  
859 nucleotide-gated channel lead to abnormal thermosensation and chemosensation  
860 in *C. elegans*. *Neuron* 17(4):707–718.
- 861 46. Li C, Kim K (2008) Neuropeptides. *WormBook*:1–36.
- 862 47. Husson SJ, Clynen E, Baggerman G, Janssen T, Schoofs L (2006) Defective  
863 processing of neuropeptide precursors in *Caenorhabditis elegans* lacking  
864 proprotein convertase 2 (KPC-2/EGL-3): mutant analysis by mass spectrometry.  
865 *J Neurochem* 98(6):1999–2012.
- 866 48. Chase DL, Koelle MR (2007) Biogenic amine neurotransmitters in *C. elegans*.  
867 *WormBook*:1–15.
- 868 49. Moss CF, Surlykke A (2010) Probing the natural scene by echolocation in bats.  
869 *Front Behav Neurosci* 4. doi:10.3389/fnbeh.2010.00033.
- 870 50. Hong W, et al. (2015) Automated measurement of mouse social behaviors using  
871 depth sensing, video tracking, and machine learning. *Proc Natl Acad Sci USA*  
872 112(38):E5351–E5360.
- 873 51. Gershow M, et al. (2012) Controlling airborne cues to study small animal  
874 navigation. *Nat Meth* 9(3):290–296.
- 875 52. Albrecht DR, Bargmann CI (2011) High-content behavioral analysis of  
876 *Caenorhabditis elegans* in precise spatiotemporal chemical environments. *Nat*  
877 *Meth* 8(7):599–605.
- 878 53. Burges CJC (1998) A tutorial on support vector machines for pattern recognition.  
879 *Data Mining and Knowledge Discovery* 2(2):121–167.
- 880 54. LeCun Y, Bengio Y, Hinton G (2015) Deep learning. *Nature* 521(7553):436–  
881 444.
- 882
- 883

884 **Table 1. A list of behavioral features used for worms' olfactory navigation**

| Parameters                         | Definition                                                  | 885 |
|------------------------------------|-------------------------------------------------------------|-----|
| <i>RunNum</i>                      | Number of a run                                             | 886 |
| <i>RunTime</i>                     | Start time of a run                                         |     |
| <i>RunDur</i>                      | Duration of a run                                           |     |
| <i>PirDur</i>                      | Duration of the previous pirouette                          |     |
| <i>V_Ave</i>                       | Average velocity during a run                               |     |
| <i>V_Ini</i>                       | Velocity at run initiation                                  |     |
| <i>V_Ter</i>                       | Velocity at run termination                                 |     |
| <i>dV_Ave</i>                      | Average acceleration during a run                           |     |
| <i>dV_Ini</i>                      | Acceleration at run initiation                              |     |
| <i>dV_Ter</i>                      | Acceleration at run termination                             |     |
| <i>B_Ave</i>                       | Bearing of migratory vector throughout a run                |     |
| <i>B_Ini</i>                       | Bearing at run initiation                                   |     |
| <i>B_Ter</i>                       | Bearing at run termination                                  |     |
| <i>dB_Ave</i>                      | Average temporal changes in bearing                         |     |
| <i>dB_Ini</i>                      | Temporal changes in bearing at run initiation               |     |
| <i>dB_Ter</i>                      | Temporal changes in bearing at run termination              |     |
| <i>C_Ave</i>                       | Average odor concentration during a run                     |     |
| <i>C_Ini</i>                       | Odor concentration at run initiation                        |     |
| <i>C_Ter</i>                       | Odor concentration at run termination                       |     |
| <i>dC_Ave</i>                      | Average temporal changes in odor concentration during a run |     |
| <i>dC_Ini</i>                      | Temporal changes in odor concentration at run initiation    |     |
| <i>dC_Ter</i>                      | Temporal changes in odor concentration at run termination   |     |
| <i>Dir_Ave</i>                     | Average directionality ratio                                |     |
| <i>Dir_Ini</i>                     | Directionality ratio at run initiation                      |     |
| <i>Dir_Ter</i>                     | Directionality ratio at run termination                     |     |
| <i>WV</i>                          | Curving rate of a run                                       |     |
| <i>RunDur<math>\Delta</math></i>   | Current <i>RunDur</i> minus the previous <i>RunDur</i>      |     |
| <i>PirDur<math>\Delta</math></i>   | Current <i>PirDur</i> minus the previous <i>PirDur</i>      |     |
| <i>WV<math>\Delta</math></i>       | Current <i>WV</i> minus the previous <i>WV</i>              |     |
| <i>X_Ave<math>\Delta</math>Ave</i> | Current <i>Ave</i> minus the previous <i>Ave</i>            |     |
| <i>X_Ave<math>\Delta</math>Ini</i> | Current <i>Ave</i> minus the previous <i>Ini</i>            |     |
| <i>X_Ave<math>\Delta</math>Ter</i> | Current <i>Ave</i> minus the previous <i>Ter</i>            |     |
| <i>X_Ini<math>\Delta</math>Ave</i> | Current <i>Ini</i> minus the previous <i>Ave</i>            |     |
| <i>X_Ini<math>\Delta</math>Ini</i> | Current <i>Ini</i> minus the previous <i>Ini</i>            |     |
| <i>X_Ini<math>\Delta</math>Ter</i> | Current <i>Ini</i> minus the previous <i>Ter</i>            |     |
| <i>X_Ter<math>\Delta</math>Ave</i> | Current <i>Ter</i> minus the previous <i>Ave</i>            |     |
| <i>X_Ter<math>\Delta</math>Ini</i> | Current <i>Ter</i> minus the previous <i>Ini</i>            |     |
| <i>X_Ter<math>\Delta</math>Ter</i> | Current <i>Ter</i> minus the previous <i>Ter</i>            |     |

( $X = V, dV, B, dB, C, dC, Dir$ )



887 **Table 2. Extracted features of worms' olfactory navigation modulated by prior**  
 888 **odor experience**

| naïve vs pre-exp         |        | mock vs pre-exp          |        |
|--------------------------|--------|--------------------------|--------|
| <i>V_Ave</i>             | 0.1796 | <b><i>C_Ter</i></b>      | 0.1337 |
| <b><i>Run_Dur</i></b>    | 0.1558 | <b><i>C_Ave</i></b>      | 0.0998 |
| <b><i>dB_Ini</i></b>     | 0.1349 | <b><i>C_Ini</i></b>      | 0.0932 |
| <i>C_IniΔAve</i>         | 0.1230 | <b><i>dC_Ave</i></b>     | 0.0854 |
| <i>C_IniΔIni</i>         | 0.1230 | <b><i>dC_Ini</i></b>     | 0.0810 |
| <b><i>dB_TerΔIni</i></b> | 0.1191 | <b><i>dC_Ter</i></b>     | 0.0749 |
| <b><i>dB_AveΔIni</i></b> | 0.1013 | <b><i>dC_IniΔTer</i></b> | 0.0722 |
| <b><i>C_Ave</i></b>      | 0.0983 | <b><i>dC_TerΔIni</i></b> | 0.0490 |
| <b><i>C_Ter</i></b>      | 0.0942 | <b><i>dV_AveΔIni</i></b> | 0.0478 |
| <i>dB_IniΔTer</i>        | 0.0924 | <b><i>dV_Ini</i></b>     | 0.0478 |
| <b><i>C_Ini</i></b>      | 0.0914 | <b><i>dV_Ave</i></b>     | 0.0364 |
| <i>dB_IniΔAve</i>        | 0.0839 | <b><i>Run_Dur</i></b>    | 0.0352 |
| <i>V_AveΔAve</i>         | 0.0815 | <b><i>dB_Ini</i></b>     | 0.0342 |
| <b><i>dC_Ter</i></b>     | 0.0810 | <b><i>dB_TerΔIni</i></b> | 0.0304 |
| <i>Run_DurΔ</i>          | 0.0785 | <b><i>dB_AveΔIni</i></b> | 0.0298 |
| <b><i>dC_Ave</i></b>     | 0.0547 |                          |        |
| <i>C_AveΔTer</i>         | 0.0394 |                          |        |
| <i>Pir_Dur</i>           | 0.0326 |                          |        |

889 Bold letters indicate features shared between the two comparisons.

890

891 **Table 3. Summary of extracted features of wild-type and mutant strains that are modulated by prior odor experience**

| strain               | <i>RunDur</i> | <i>V_Ave</i> | <i>V_Ini</i> | <i>V_Ter</i> | <i>B_Ter</i> | <i>dB_Ini</i> | <i>C_Ave</i> | <i>C_Ini</i> | <i>C_Ter</i> | <i>dC_Ave</i> | <i>dC_Ter</i> | <i>Dir_Ave</i> | <i>RunNum</i> |
|----------------------|---------------|--------------|--------------|--------------|--------------|---------------|--------------|--------------|--------------|---------------|---------------|----------------|---------------|
| wild-type            | up            |              |              |              |              | down          | down         | down         | down         | up            | up            |                |               |
| <i>egl-3(n589)</i>   |               |              |              |              |              |               | up           | up           | up           |               |               |                |               |
| <i>egl-3(ok979)</i>  |               | down         | down         | down         |              | down          | up           | up           | up           |               |               |                |               |
| <i>dop-3(tm1356)</i> | up            | down         |              | down         | up           |               |              |              |              | up            | up            | down           |               |
| <i>ocr-2(ak47)</i>   |               | up           |              | up           | up           |               |              |              |              |               |               |                |               |
| <i>osm-9(ky10)</i>   | up            | up           |              | up           |              |               |              |              |              |               |               |                |               |
| <i>tax-4(p678)</i>   |               |              |              |              |              |               |              |              |              |               |               |                | up            |

892 Only features with statistical differences between preexposed worms versus naive *and* mock-treated worms are shown.

893

894 **Table 4. A list of behavioral features used for bats' acoustic navigation**

| <b>Parameters</b>      | <b>Definition</b>                                                           |
|------------------------|-----------------------------------------------------------------------------|
| $V(t)$                 | Fight velocity in 3D space                                                  |
| $dV(t)$                | Flight acceleration in 3D space                                             |
| $B_{\text{hori}}(t)$   | Absolut bearing of the flight vector in a horizontal plane                  |
| $dB_{\text{hori}}(t)$  | Temporal change in bearing of the flight vector in a horizontal plane       |
| $ddB_{\text{hori}}(t)$ | Temporal acceleration in bearing of the flight vector in a horizontal plane |
| $B_{\text{vert}}(t)$   | Absolut bearing of the flight vector in a vertical plane                    |
| $B_{\text{obs}}(t)$    | Absolute bearing to the edge point of the nearest chain array               |
| $R_{\text{obs}}(t)$    | Distance from the bat to the edge point of the nearest chain array          |
| $R_x(t)$               | Longitudinal directional distance to the frontal chain array                |
| $R_y(t)$               | Lateral directional distance to the inside pitch of the chain array         |
| $dH(t)$                | Temporal change in flight height                                            |

895

896  $t = -0.3, -0.2, -0.1, \text{ or } 0$  s.  $B_{\text{obs}}(t)$  and  $R_x(t)$  were not calculated for  $t = 0$ .

897

898

# Figure 1

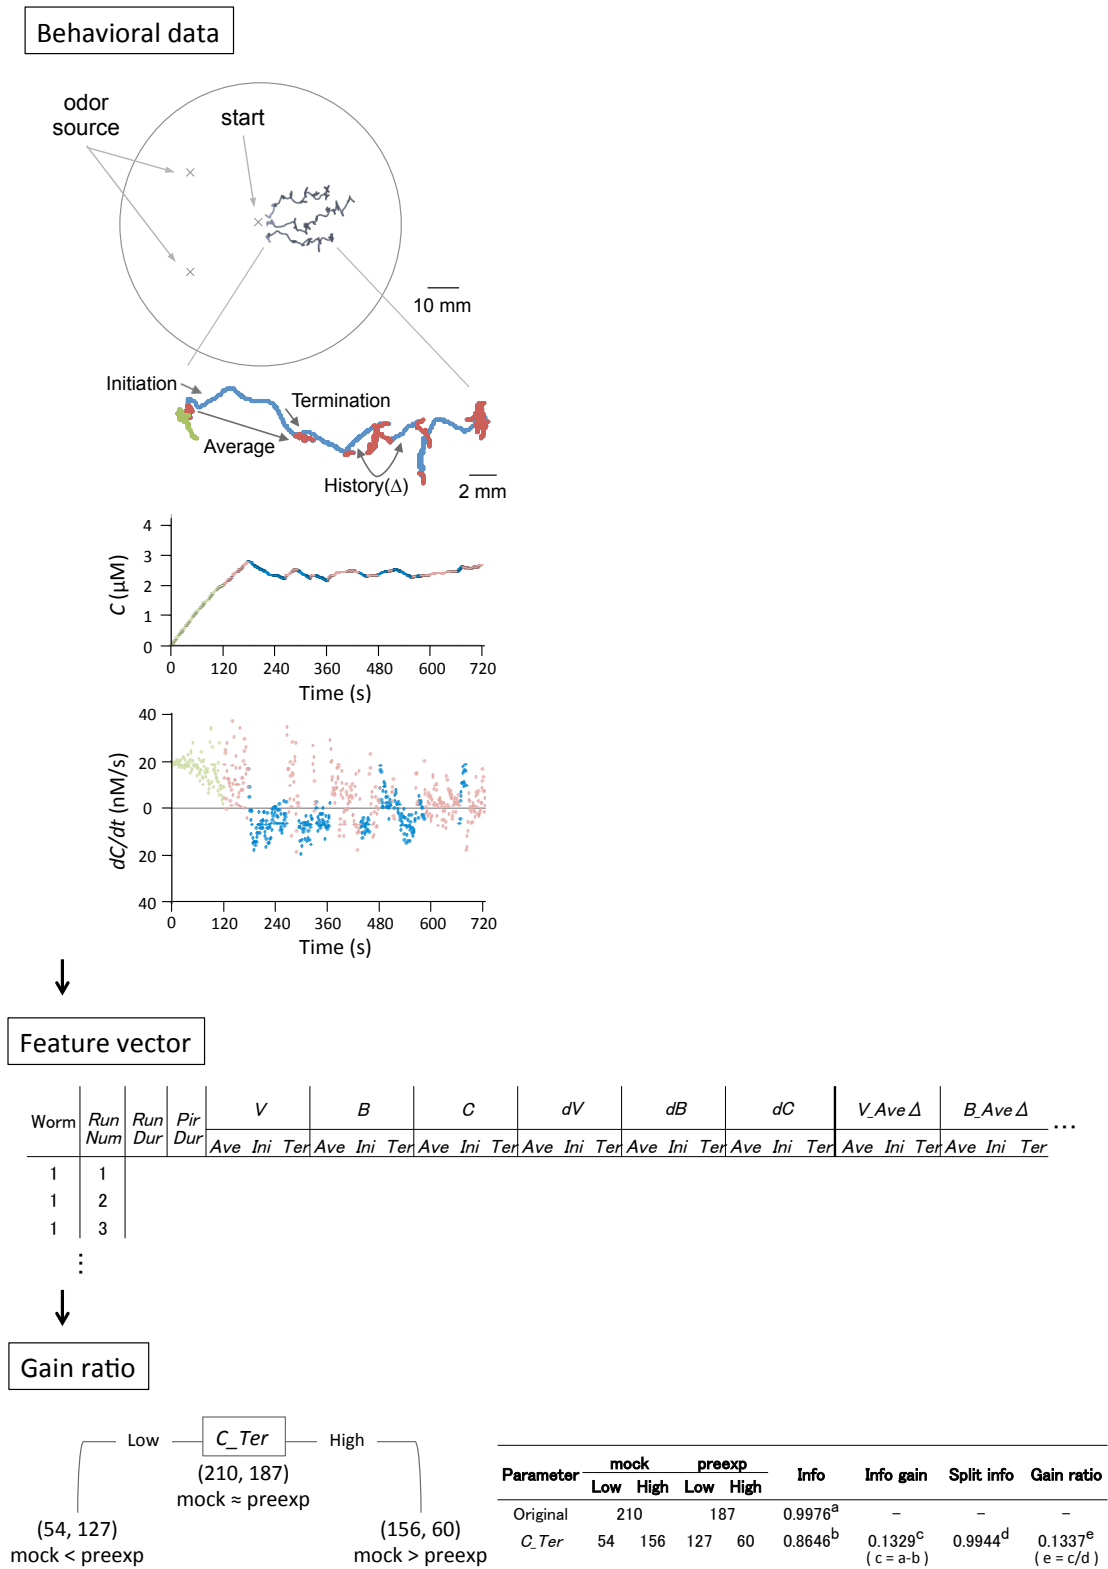

Figure 2

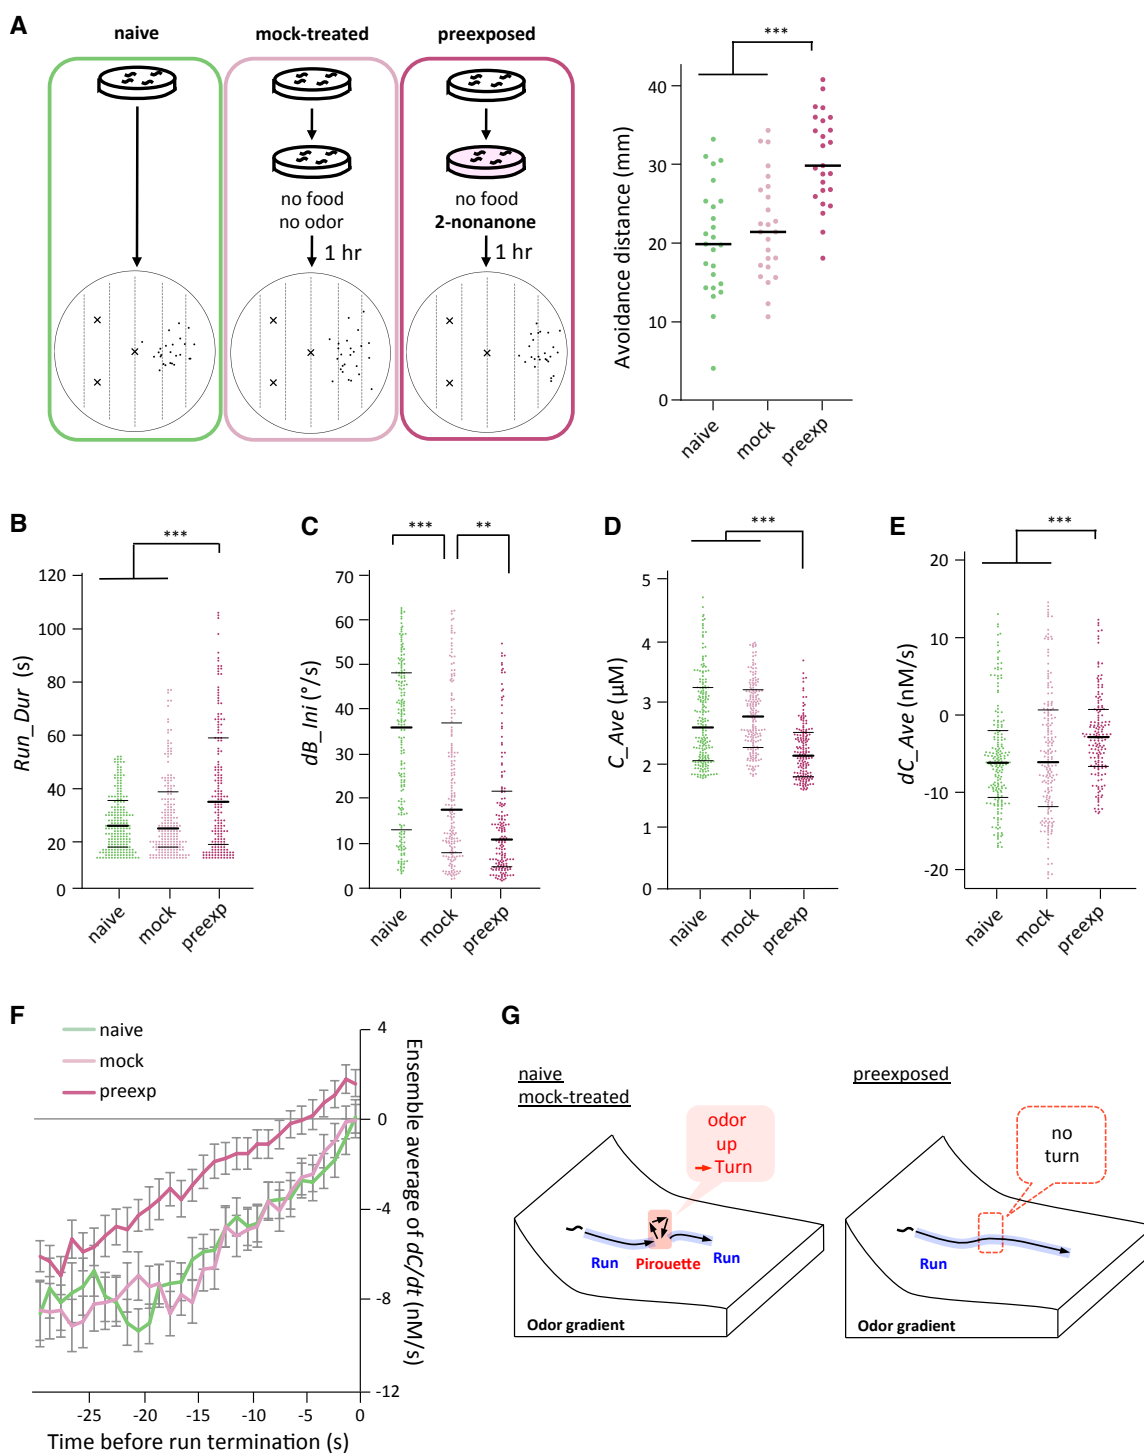

Figure 3

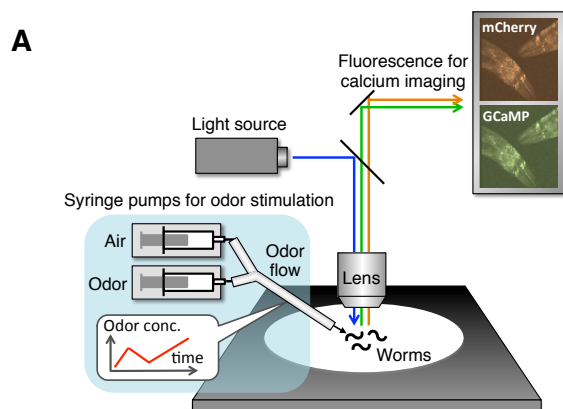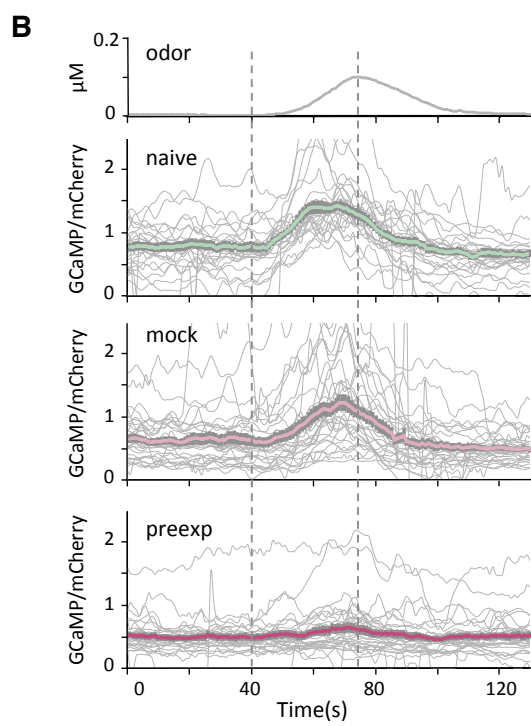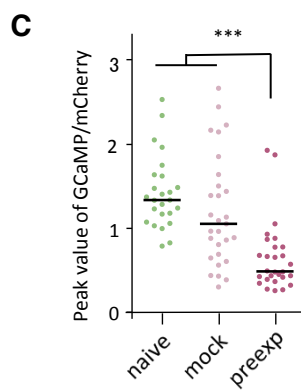

Figure 4

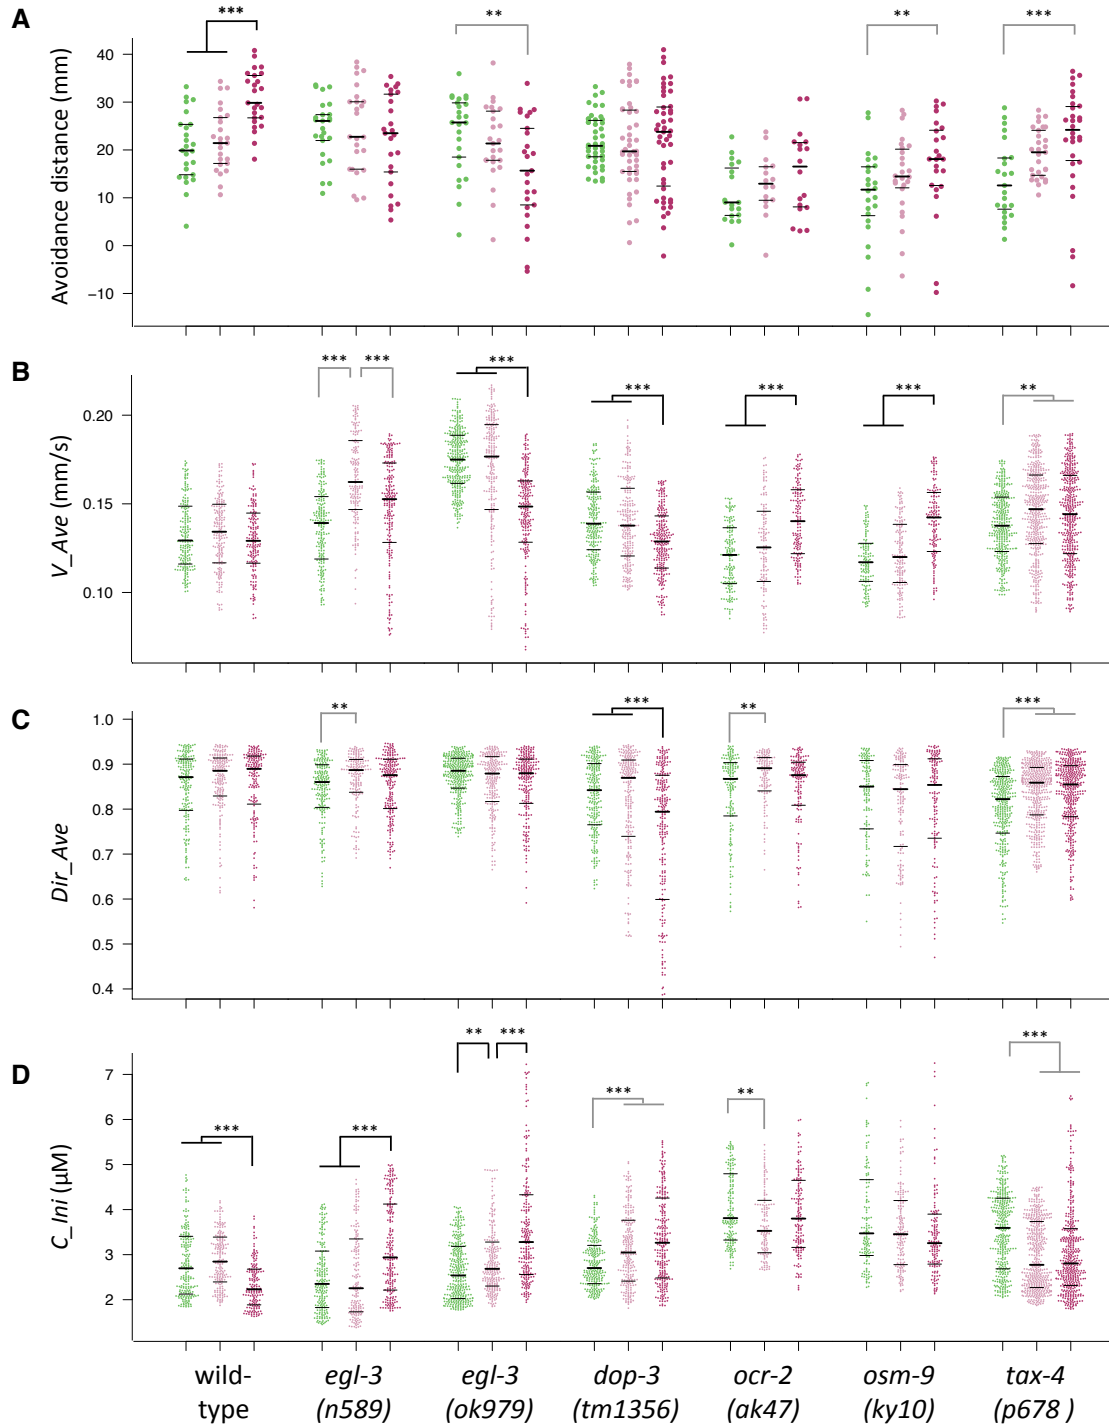

Figure 5

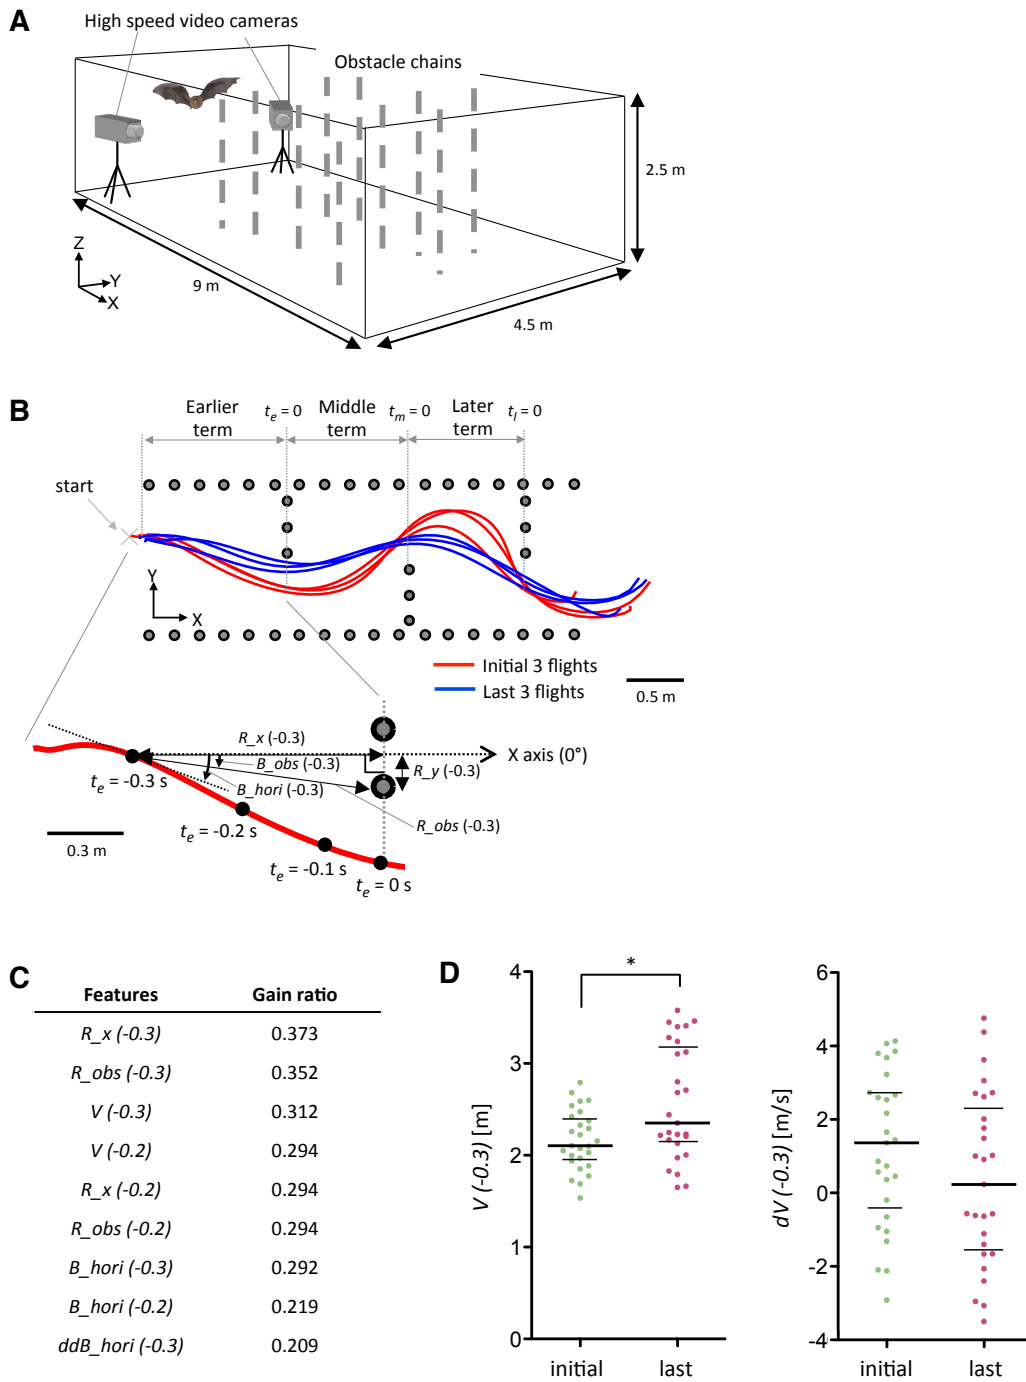



# Supplementary Table 1

**Supplementary Table 1. Detailed results of statistical tests.**

| Figure | Parameter                                            | Number of naive | Number of mock | Number of preexp. | Unit of number | Multiple test              | d.f. value of multiple test | p value of multiple test | Other result of multiple test | Post-hock test             | d.f. value of post-hock test | p value of post-hock test                                                                              | Other result of post-hock test            |
|--------|------------------------------------------------------|-----------------|----------------|-------------------|----------------|----------------------------|-----------------------------|--------------------------|-------------------------------|----------------------------|------------------------------|--------------------------------------------------------------------------------------------------------|-------------------------------------------|
| 2A, 4A | Avoidance distance of N2                             | 25              | 25             | 25                | animals        | Kruskal-Wallis test        | 2                           | <0.0001(***)             | 24.451                        | Dunn's test                | 1                            | naive vs mock: 0.7621(ns)<br>naive vs preexposure: <0.0001(***)<br>mock vs preexposure: 0.0001(***)    | Z = 0.5619<br>Z = 4.5747<br>Z = 3.9128    |
| 2B     | Run duration of N2                                   | 219             | 210            | 187               | runs           | Kruskal-Wallis test        | 2                           | <0.0001(***)             | 18.76                         | Dunn's test                | 1                            | naive vs mock: 1(ns)<br>naive vs preexposure: <0.0001(***)<br>mock vs preexposure: 0.0006(***)         | Z = -0.4269<br>Z = -3.9959<br>Z = -3.547  |
| 2C     | Initial dBearing of N2                               | 219             | 210            | 187               | runs           | Mardia-Watson-Wheeler test | 2                           | <0.0001(***)             | 64.69                         | Mardia-Watson-Wheeler test | 1                            | naive vs mock: <0.0001(***)<br>naive vs preexposure: <0.0001(***)<br>mock vs preexposure: 0.002(**)    | W = 26.306<br>W = 59.795<br>W = 12.007    |
| 2D     | Average Conc. of N2                                  | 219             | 210            | 187               | runs           | Kruskal-Wallis test        | 2                           | <0.0001(***)             | 68.69                         | Dunn's test                | 1                            | naive vs mock: 0.1351(ns)<br>naive vs preexposure: <0.0001(***)<br>mock vs preexposure: <0.0001(***)   | Z = -1.6951<br>Z = 6.3349<br>Z = 7.9016   |
| 2E     | Average dConc. of N2                                 | 219             | 210            | 187               | runs           | Kruskal-Wallis test        | 2                           | 0.0003(***)              | 16.56                         | Dunn's test                | 1                            | naive vs mock: 0.3202(ns)<br>naive vs preexposure: <0.0001(***)<br>mock vs preexposure: 0.0085(**)     | Z = -1.2441<br>Z = -4.001<br>Z = -2.7671  |
| 3C     | Peak value of GCaMP3/mCherry                         | 25              | 29             | 28                | animals        | Kruskal-Wallis test        | 2                           | <0.0001(***)             | 30.11                         | Dunn's test                | 1                            | naive vs mock: 0.0948(ns)<br>naive vs preexposure: <0.0001(***)<br>mock vs preexposure: 0.0004(***)    | Z = 1.8671<br>Z = 5.3668<br>Z = 3.6525    |
| 4A     | Avoidance distance of <i>egl-3(n589)</i>             | 25              | 25             | 25                | animals        | Kruskal-Wallis test        | 2                           | 0.7763(ns)               | 0.51                          | Dunn's test                | 1                            | -                                                                                                      | -                                         |
| 4A     | Avoidance distance of <i>egl-3(ok979)</i>            | 25              | 25             | 25                | animals        | Kruskal-Wallis test        | 2                           | 0.0128(*)                | 8.72                          | Dunn's test                | 1                            | naive vs mock: 0.3924(ns)<br>naive vs preexposure: 0.0051(**)<br>mock vs preexposure: 0.1068(ns)       | Z = -1.1226<br>Z = -2.9265<br>Z = -1.8039 |
| 4A     | Avoidance distance of <i>dop-3(tm1356)</i>           | 46              | 46             | 47                | animals        | Kruskal-Wallis test        | 2                           | 0.8196(ns)               | 0.40                          | Dunn's test                | 1                            | -                                                                                                      | -                                         |
| 4A     | Avoidance distance of <i>ocr-2(ok47)</i>             | 19              | 16             | 18                | animals        | Kruskal-Wallis test        | 2                           | 0.2001(ns)               | 3.22                          | Dunn's test                | 1                            | -                                                                                                      | -                                         |
| 4A     | Avoidance distance of <i>osm-9(y10)</i>              | 24              | 26             | 24                | animals        | Kruskal-Wallis test        | 2                           | 0.0191(*)                | 7.91                          | Dunn's test                | 1                            | naive vs mock: 0.1625(ns)<br>naive vs preexposure: 0.0075(**)<br>mock vs preexposure: 0.3141(ns)       | Z = 1.6058<br>Z = 2.8055<br>Z = 1.2552    |
| 4A     | Avoidance distance of <i>tax-4(p678)</i>             | 23              | 29             | 30                | animals        | Kruskal-Wallis test        | 2                           | 0.0008(***)              | 14.39                         | Dunn's test                | 1                            | naive vs mock: 0.0506(ns)<br>naive vs preexposure: 0.0002(***)<br>mock vs preexposure: 0.1175(ns)      | Z = 2.1232<br>Z = 3.7932<br>Z = 1.7605    |
| 4B     | Average speed of N2                                  | 219             | 210            | 187               | runs           | Kruskal-Wallis test        | 2                           | 0.2796(ns)               | 2.55                          | Dunn's test                | 1                            | -                                                                                                      | -                                         |
| 4B     | Average speed of <i>egl-3(n589)</i>                  | 227             | 194            | 235               | runs           | Kruskal-Wallis test        | 2                           | <0.0001(***)             | 80.44                         | Dunn's test                | 1                            | naive vs mock: <0.0001(***)<br>naive vs preexposure: <0.0001(***)<br>mock vs preexposure: <0.0001(***) | Z = -8.9653<br>Z = -4.5544<br>Z = 4.6671  |
| 4B     | Average speed of <i>egl-3(ok979)</i>                 | 370             | 260            | 252               | runs           | Kruskal-Wallis test        | 2                           | <0.0001(***)             | 137.51                        | Dunn's test                | 1                            | naive vs mock: 0.3296(ns)<br>naive vs preexposure: <0.0001(***)<br>mock vs preexposure: <0.0001(***)   | Z = 1.2272<br>Z = 11.1444<br>Z = 9.1734   |
| 4B     | Average speed of <i>dop-3(tm1356)</i>                | 276             | 266            | 279               | runs           | Kruskal-Wallis test        | 2                           | <0.0001(***)             | 39.19                         | Dunn's test                | 1                            | naive vs mock: 0.6155(ns)<br>naive vs preexposure: <0.0001(***)<br>mock vs preexposure: <0.0001(***)   | Z = 0.8234<br>Z = 5.795<br>Z = 4.9154     |
| 4B     | Average speed of <i>ocr-2(ok47)</i>                  | 180             | 142            | 168               | runs           | Kruskal-Wallis test        | 2                           | <0.0001(***)             | 50.52                         | Dunn's test                | 1                            | naive vs mock: 0.075(ns)<br>naive vs preexposure: <0.0001(***)<br>mock vs preexposure: <0.0001(***)    | Z = -1.9599<br>Z = 6.9657<br>Z = -6.6254  |
| 4B     | Average speed of <i>osm-9(y10)</i>                   | 147             | 175            | 160               | runs           | Kruskal-Wallis test        | 2                           | <0.0001(***)             | 66.85                         | Dunn's test                | 1                            | naive vs mock: 0.2053(ns)<br>naive vs preexposure: <0.0001(***)<br>mock vs preexposure: <0.0001(***)   | Z = -1.4875<br>Z = 7.5979<br>Z = -6.4146  |
| 4B     | Average speed of <i>tax-4(p678)</i>                  | 402             | 531            | 473               | runs           | Kruskal-Wallis test        | 2                           | <0.0001(***)             | 20.69                         | Dunn's test                | 1                            | naive vs mock: <0.0001(***)<br>naive vs preexposure: 0.0019(**)<br>mock vs preexposure: 0.3492(ns)     | Z = -4.456<br>Z = -3.2307<br>Z = 1.1931   |
| 4C     | Average directionality ratio of N2                   | 219             | 210            | 187               | runs           | Kruskal-Wallis test        | 2                           | 0.2781(ns)               | 2.56                          | Dunn's test                | 1                            | -                                                                                                      | -                                         |
| 4C     | Average directionality ratio of <i>egl-3(n589)</i>   | 227             | 194            | 235               | runs           | Kruskal-Wallis test        | 2                           | 0.0042(**)               | 10.96                         | Dunn's test                | 1                            | naive vs mock: 0.0014(**)<br>naive vs preexposure: 0.1115(ns)<br>mock vs preexposure: 0.1585(ns)       | Z = -3.3036<br>Z = -1.7844<br>Z = 1.6179  |
| 4C     | Average directionality ratio of <i>egl-3(ok979)</i>  | 370             | 260            | 252               | runs           | Kruskal-Wallis test        | 2                           | 0.1357(ns)               | 4.00                          | Dunn's test                | 1                            | -                                                                                                      | -                                         |
| 4C     | Average directionality ratio of <i>dop-3(tm1356)</i> | 276             | 266            | 279               | runs           | Kruskal-Wallis test        | 2                           | <0.0001(***)             | 38.61                         | Dunn's test                | 1                            | naive vs mock: 1(ns)<br>naive vs preexposure: <0.0001(***)<br>mock vs preexposure: <0.0001(***)        | Z = -0.3986<br>Z = 5.1836<br>Z = 5.5349   |
| 4C     | Average directionality ratio of <i>ocr-2(ok47)</i>   | 180             | 142            | 168               | runs           | Kruskal-Wallis test        | 2                           | 0.0135(*)                | 8.62                          | Dunn's test                | 1                            | naive vs mock: 0.0062(**)<br>naive vs preexposure: 0.6577(ns)<br>mock vs preexposure: 0.0541(ns)       | Z = -2.8994<br>Z = -0.7747<br>Z = 2.0962  |
| 4C     | Average directionality ratio of <i>osm-9(y10)</i>    | 147             | 175            | 160               | runs           | Kruskal-Wallis test        | 2                           | 0.6949(ns)               | 0.73                          | Dunn's test                | 1                            | -                                                                                                      | -                                         |
| 4C     | Average directionality ratio of <i>tax-4(p678)</i>   | 402             | 531            | 473               | runs           | Kruskal-Wallis test        | 2                           | <0.0001(***)             | 37.08                         | Dunn's test                | 1                            | naive vs mock: <0.0001(***)<br>naive vs preexposure: <0.0001(***)<br>mock vs preexposure: 1(ns)        | Z = -5.4554<br>Z = -5.2773<br>Z = 0.0423  |
| 4D     | Initial Conc. of N2                                  | 219             | 210            | 187               | runs           | Kruskal-Wallis test        | 2                           | <0.0001(***)             | 57.75                         | Dunn's test                | 1                            | naive vs mock: 0.1381(ns)<br>naive vs preexposure: <0.0001(***)<br>mock vs preexposure: <0.0001(***)   | Z = -1.6846<br>Z = 5.7215<br>Z = 7.284    |
| 4D     | Initial Conc. of <i>egl-3(n589)</i>                  | 227             | 194            | 235               | runs           | Kruskal-Wallis test        | 2                           | <0.0001(***)             | 48.82                         | Dunn's test                | 1                            | naive vs mock: 1(ns)<br>naive vs preexposure: <0.0001(***)<br>mock vs preexposure: <0.0001(***)        | Z = 0.6374<br>Z = -6.0955<br>Z = -5.8855  |
| 4D     | Initial Conc. of <i>egl-3(ok979)</i>                 | 370             | 260            | 252               | runs           | Kruskal-Wallis test        | 2                           | <0.0001(***)             | 83.00                         | Dunn's test                | 1                            | naive vs mock: 0.002(**)<br>naive vs preexposure: <0.0001(***)<br>mock vs preexposure: <0.0001(***)    | Z = -3.2048<br>Z = -9.0932<br>Z = -5.4678 |
| 4D     | Initial Conc. of <i>dop-3(tm1356)</i>                | 276             | 266            | 279               | runs           | Kruskal-Wallis test        | 2                           | <0.0001(***)             | 30.83                         | Dunn's test                | 1                            | naive vs mock: 0.001(***)<br>naive vs preexposure: <0.0001(***)<br>mock vs preexposure: 0.064(ns)      | Z = -3.4101<br>Z = -5.4972<br>Z = -0.2089 |
| 4D     | Initial Conc. of <i>ocr-2(ok47)</i>                  | 180             | 142            | 168               | runs           | Kruskal-Wallis test        | 2                           | 0.0151(*)                | 8.38                          | Dunn's test                | 1                            | naive vs mock: 0.0057(**)<br>naive vs preexposure: 0.2973(ns)<br>mock vs preexposure: 0.1517(ns)       | Z = 2.8947<br>Z = 1.2868<br>Z = -1.6393   |
| 4D     | Initial Conc. of <i>osm-9(y10)</i>                   | 147             | 175            | 160               | runs           | Kruskal-Wallis test        | 2                           | 0.0837(ns)               | 5.51                          | Dunn's test                | 1                            | -                                                                                                      | -                                         |
| 4D     | Initial Conc. of <i>tax-4(p678)</i>                  | 402             | 531            | 473               | runs           | Kruskal-Wallis test        | 2                           | <0.0001(***)             | 76.84                         | Dunn's test                | 1                            | naive vs mock: <0.0001(***)<br>naive vs preexposure: <0.0001(***)<br>mock vs preexposure: 0.8193(ns)   | Z = 8.0792<br>Z = 7.3115<br>Z = -0.6035   |
| 5D     | Flight velocity in 3D space at t=-0.3                | 2               | 27             | 27                | flights        | Mann-Whitney test          |                             | 0.0234(*)                |                               | Mann-Whitney U = 233.0     |                              |                                                                                                        |                                           |
| 5D     | Flight acceleration in 3D space at t=-0.3            | 2               | 27             | 27                | flights        | Mann-Whitney test          |                             | 0.2326(ns)               |                               | Mann-Whitney U = 295.0     |                              |                                                                                                        |                                           |
